# Supplementary material for: Moderation of Structural DNA Properties by Coupled Dinucleotide Contents in Eukaryotes
Source: MDPI journal article supplement (doi:10.3390/genes14030755), 2023-03-20
Supplement: s1 [file s1]

**Table S1: Accession numbers of added genomes**

| Species                     | Accession Numbers         |
|-----------------------------|---------------------------|
| <i>Gorilla gorilla</i>      | NC_044602.1 - NC_044625.1 |
| <i>Pongo abelii</i>         | NC_036903.1 - NC_036926.1 |
| <i>Microcebus Murinus</i>   | NC_033660.1 - NC_033692.1 |
| <i>Microtus ochrogaster</i> | NC_022009.1 - NC_022036.1 |
| <i>Ochotona princeps</i>    | NC_050536.1 - NC_050568.1 |
| <i>Macaca mulatta</i>       | NC_027893.1 - NC_027914.1 |

**Table S2: Correlation values and significance levels between dinucleotide pairs:** Pearson correlation values of normalized chromosomal dinucleotide contents for empirical content and model contents (model1: binomial, model2: Chargaff binomial). The significance levels are calculated by dividing the difference between empirical and model values by the respective error of the correlation value.

| dinucleotides |    | empirical<br>correlation<br>value | model1<br>correlation<br>value | model1<br>significance<br>level | model2<br>correlation<br>value | model2<br>significance<br>level |
|---------------|----|-----------------------------------|--------------------------------|---------------------------------|--------------------------------|---------------------------------|
| TT            | AA | 1.00                              | -0.01 ± 0.10                   | 10.57                           | 0.37 ± 0.10                    | 6.26                            |
| AT            | AA | -0.56                             | 0.01 ± 0.10                    | -5.50                           | 0.01 ± 0.10                    | -5.66                           |
| AT            | TT | -0.56                             | 0.03 ± 0.10                    | -5.81                           | 0.02 ± 0.10                    | -5.86                           |
| TA            | AA | -0.63                             | -0.02 ± 0.12                   | -5.32                           | -0.00 ± 0.11                   | -5.53                           |
| TA            | TT | -0.64                             | -0.01 ± 0.11                   | -5.48                           | 0.01 ± 0.10                    | -6.47                           |
| TA            | AT | 0.69                              | 0.01 ± 0.07                    | 9.10                            | 0.05 ± 0.13                    | 4.98                            |
| AC            | AA | -0.36                             | 0.03 ± 0.09                    | -4.47                           | 0.04 ± 0.14                    | -2.89                           |
| AC            | TT | -0.36                             | -0.00 ± 0.13                   | -2.76                           | -0.04 ± 0.13                   | -2.51                           |
| AC            | AT | 0.21                              | -0.02 ± 0.10                   | 2.39                            | -0.07 ± 0.08                   | 3.49                            |
| AC            | TA | 0.34                              | 0.03 ± 0.11                    | 2.83                            | -0.02 ± 0.11                   | 3.25                            |
| CA            | AA | -0.18                             | 0.04 ± 0.10                    | -2.15                           | 0.05 ± 0.11                    | -2.00                           |
| CA            | TT | -0.18                             | 0.08 ± 0.09                    | -2.71                           | 0.05 ± 0.12                    | -1.88                           |
| CA            | AT | -0.44                             | 0.06 ± 0.11                    | -4.62                           | -0.05 ± 0.12                   | -3.24                           |
| CA            | TA | -0.31                             | -0.04 ± 0.1                    | -2.69                           | -0.02 ± 0.09                   | -3.07                           |
| CA            | AC | -0.05                             | 0.00 ± 0.12                    | -0.41                           | 0.18 ± 0.11                    | -2.13                           |
| TG            | AA | -0.18                             | 0.01 ± 0.10                    | -1.98                           | 0.08 ± 0.13                    | -1.97                           |
| TG            | TT | -0.18                             | 0.03 ± 0.07                    | -2.97                           | 0.06 ± 0.10                    | -2.46                           |
| TG            | AT | -0.44                             | 0.00 ± 0.05                    | -9.19                           | -0.06 ± 0.12                   | -3.19                           |
| TG            | TA | -0.3                              | 0.04 ± 0.10                    | -3.59                           | -0.06 ± 0.14                   | -1.69                           |
| TG            | AC | -0.04                             | -0.01 ± 0.08                   | -0.49                           | 0.22 ± 0.14                    | -1.88                           |
| TG            | CA | 1.0                               | -0.02 ± 0.06                   | 17.64                           | 0.43 ± 0.10                    | 5.63                            |
| GT            | AA | -0.36                             | -0.00 ± 0.06                   | -5.52                           | 0.04 ± 0.11                    | -3.49                           |
| GT            | TT | -0.36                             | 0.05 ± 0.05                    | -8.03                           | 0.05 ± 0.10                    | -4.03                           |
| GT            | AT | 0.21                              | 0.01 ± 0.08                    | 2.59                            | -0.01 ± 0.14                   | 1.59                            |
| GT            | TA | 0.34                              | -0.03 ± 0.08                   | 4.56                            | -0.03 ± 0.13                   | 2.78                            |
| GT            | AC | 0.99                              | -0.01 ± 0.07                   | 15.01                           | 0.43 ± 0.11                    | 5.18                            |
| GT            | CA | -0.05                             | 0.03 ± 0.08                    | -1.06                           | 0.16 ± 0.10                    | -2.24                           |
| GT            | TG | -0.04                             | -0.01 ± 0.07                   | -0.53                           | 0.18 ± 0.09                    | -2.60                           |
| AG            | AA | -0.15                             | 0.03 ± 0.08                    | -2.30                           | -0.01 ± 0.12                   | -1.15                           |
| AG            | TT | -0.15                             | -0.03 ± 0.08                   | -1.41                           | -0.06 ± 0.15                   | -0.63                           |
| AG            | AT | -0.53                             | -0.00 ± 0.11                   | -4.83                           | 0.04 ± 0.12                    | -4.77                           |

|    |    |       |              |       |              |       |
|----|----|-------|--------------|-------|--------------|-------|
| AG | TA | -0.28 | -0.02 ± 0.06 | -4.47 | 0.02 ± 0.14  | -2.14 |
| AG | AC | -0.56 | 0.02 ± 0.09  | -6.21 | -0.15 ± 0.17 | -2.45 |
| AG | CA | 0.59  | -0.02 ± 0.09 | 7.13  | -0.22 ± 0.15 | 5.37  |
| AG | TG | 0.59  | 0.03 ± 0.05  | 11.81 | -0.26 ± 0.12 | 7.05  |
| AG | GT | -0.56 | 0.01 ± 0.08  | -7.28 | -0.15 ± 0.09 | -4.81 |
| GA | AA | -0.11 | -0.02 ± 0.07 | -1.10 | -0.04 ± 0.12 | -0.51 |
| GA | TT | -0.1  | -0.05 ± 0.10 | -0.54 | -0.02 ± 0.07 | -1.10 |
| GA | AT | 0.27  | -0.03 ± 0.07 | 4.54  | 0.05 ± 0.10  | 2.24  |
| GA | TA | -0.19 | 0.01 ± 0.05  | -3.72 | 0.00 ± 0.11  | -1.73 |
| GA | AC | 0.04  | 0.02 ± 0.05  | 0.37  | -0.17 ± 0.11 | 1.98  |
| GA | CA | -0.57 | -0.01 ± 0.12 | -4.63 | -0.17 ± 0.08 | -4.89 |
| GA | TG | -0.57 | 0.01 ± 0.06  | -9.61 | -0.21 ± 0.05 | -6.78 |
| GA | GT | 0.03  | -0.02 ± 0.07 | 0.80  | -0.12 ± 0.10 | 1.54  |
| GA | AG | -0.17 | -0.04 ± 0.04 | -3.08 | 0.22 ± 0.10  | -4.04 |
| TC | AA | -0.1  | -0.01 ± 0.05 | -1.80 | -0.08 ± 0.13 | -0.19 |
| TC | TT | -0.1  | 0.02 ± 0.07  | -1.91 | -0.05 ± 0.15 | -0.33 |
| TC | AT | 0.27  | -0.02 ± 0.08 | 3.56  | -0.02 ± 0.11 | 2.78  |
| TC | TA | -0.19 | 0.01 ± 0.1   | -2.06 | 0.05 ± 0.12  | -1.94 |
| TC | AC | 0.03  | 0.04 ± 0.11  | -0.05 | -0.12 ± 0.12 | 1.28  |
| TC | CA | -0.57 | 0.01 ± 0.10  | -5.89 | -0.19 ± 0.11 | -3.34 |
| TC | TG | -0.57 | 0.00 ± 0.07  | -8.35 | -0.19 ± 0.14 | -2.77 |
| TC | GT | 0.03  | -0.05 ± 0.07 | 1.19  | -0.11 ± 0.13 | 1.09  |
| TC | AG | -0.17 | 0.03 ± 0.07  | -2.90 | 0.18 ± 0.18  | -1.95 |
| TC | GA | 1.0   | 0.01 ± 0.07  | 14.56 | 0.46 ± 0.11  | 5.03  |
| CT | AA | -0.15 | 0.01 ± 0.06  | -2.93 | -0.05 ± 0.11 | -0.96 |
| CT | TT | -0.15 | 0.02 ± 0.10  | -1.66 | -0.04 ± 0.10 | -1.04 |
| CT | AT | -0.53 | 0.03 ± 0.12  | -4.72 | 0.07 ± 0.10  | -6.12 |
| CT | TA | -0.28 | 0.08 ± 0.07  | -5.29 | -0.00 ± 0.13 | -2.10 |
| CT | AC | -0.55 | -0.03 ± 0.12 | -4.50 | -0.16 ± 0.13 | -3.05 |
| CT | CA | 0.59  | 0.05 ± 0.09  | 6.09  | -0.18 ± 0.15 | 5.19  |
| CT | TG | 0.59  | 0.01 ± 0.07  | 7.74  | -0.23 ± 0.08 | 9.84  |
| CT | GT | -0.56 | 0.00 ± 0.09  | -6.48 | -0.20 ± 0.05 | -7.85 |
| CT | AG | 1.0   | -0.00 ± 0.10 | 9.83  | 0.49 ± 0.08  | 6.44  |
| CT | GA | -0.17 | 0.03 ± 0.08  | -2.38 | 0.23 ± 0.05  | -7.66 |
| CT | TC | -0.17 | -0.03 ± 0.11 | -1.35 | 0.23 ± 0.15  | -2.78 |
| CC | AA | 0.28  | -0.02 ± 0.06 | 4.78  | 0.11 ± 0.19  | 0.86  |
| CC | TT | 0.28  | -0.04 ± 0.14 | 2.29  | 0.12 ± 0.17  | 0.91  |
| CC | AT | -0.26 | -0.00 ± 0.08 | -3.45 | -0.09 ± 0.17 | -1.03 |
| CC | TA | -0.1  | -0.01 ± 0.13 | -0.72 | -0.08 ± 0.19 | -0.12 |
| CC | AC | -0.63 | -0.02 ± 0.12 | -5.11 | 0.30 ± 0.17  | -5.44 |
| CC | CA | 0.34  | 0.02 ± 0.06  | 5.52  | 0.30 ± 0.17  | 0.23  |
| CC | TG | 0.34  | -0.03 ± 0.04 | 8.42  | 0.37 ± 0.08  | -0.41 |
| CC | GT | -0.62 | 0.02 ± 0.11  | -5.94 | 0.34 ± 0.11  | -9.05 |
| CC | AG | 0.43  | -0.04 ± 0.10 | 4.47  | -0.37 ± 0.12 | 6.75  |
| CC | GA | -0.57 | 0.03 ± 0.13  | -4.66 | -0.31 ± 0.08 | -3.23 |
| CC | TC | -0.57 | -0.02 ± 0.08 | -6.84 | -0.32 ± 0.22 | -1.12 |
| CC | CT | 0.42  | 0.03 ± 0.12  | 3.22  | -0.37 ± 0.09 | 9.05  |

|    |    |       |              |        |              |        |
|----|----|-------|--------------|--------|--------------|--------|
| GG | AA | 0.27  | 0.01 ± 0.06  | 4.44   | 0.12 ± 0.18  | 0.86   |
| GG | TT | 0.28  | -0.00 ± 0.06 | 4.81   | 0.13 ± 0.17  | 0.89   |
| GG | AT | -0.26 | 0.03 ± 0.05  | -6.17  | -0.10 ± 0.15 | -1.08  |
| GG | TA | -0.1  | 0.02 ± 0.07  | -1.60  | -0.05 ± 0.18 | -0.28  |
| GG | AC | -0.63 | -0.03 ± 0.08 | -7.39  | 0.27 ± 0.14  | -6.40  |
| GG | CA | 0.34  | -0.03 ± 0.07 | 5.21   | 0.30 ± 0.17  | 0.26   |
| GG | TG | 0.34  | 0.02 ± 0.06  | 5.29   | 0.40 ± 0.08  | -0.79  |
| GG | GT | -0.63 | 0.01 ± 0.08  | -7.58  | 0.31 ± 0.10  | -9.02  |
| GG | AG | 0.42  | -0.03 ± 0.09 | 5.04   | -0.38 ± 0.09 | 9.18   |
| GG | GA | -0.57 | -0.02 ± 0.07 | -8.03  | -0.30 ± 0.10 | -2.75  |
| GG | TC | -0.57 | 0.01 ± 0.08  | -7.66  | -0.31 ± 0.21 | -1.23  |
| GG | CT | 0.42  | 0.05 ± 0.07  | 5.25   | -0.40 ± 0.10 | 8.06   |
| GG | CC | 1.0   | 0.02 ± 0.10  | 9.82   | 0.76 ± 0.05  | 4.59   |
| GC | AA | -0.09 | 0.03 ± 0.14  | -0.84  | -0.09 ± 0.19 | -0.01  |
| GC | TT | -0.09 | -0.01 ± 0.06 | -1.34  | -0.09 ± 0.15 | 0.03   |
| GC | AT | 0.03  | -0.06 ± 0.09 | 1.05   | 0.10 ± 0.14  | -0.48  |
| GC | TA | 0.08  | -0.05 ± 0.09 | 1.58   | 0.06 ± 0.16  | 0.11   |
| GC | AC | 0.26  | 0.02 ± 0.12  | 1.95   | -0.29 ± 0.16 | 3.37   |
| GC | CA | -0.02 | -0.03 ± 0.10 | 0.13   | -0.28 ± 0.16 | 1.67   |
| GC | TG | -0.01 | 0.03 ± 0.06  | -0.72  | -0.35 ± 0.09 | 3.62   |
| GC | GT | 0.26  | -0.01 ± 0.06 | 4.59   | -0.32 ± 0.10 | 5.64   |
| GC | AG | -0.13 | 0.03 ± 0.06  | -2.56  | 0.33 ± 0.12  | -3.98  |
| GC | GA | 0.01  | -0.02 ± 0.07 | 0.44   | 0.30 ± 0.12  | -2.41  |
| GC | TC | 0.01  | 0.01 ± 0.11  | 0.07   | 0.29 ± 0.21  | -1.29  |
| GC | CT | -0.13 | -0.02 ± 0.08 | -1.35  | 0.34 ± 0.06  | -7.29  |
| GC | CC | -0.7  | 0.01 ± 0.06  | -11.74 | -0.61 ± 0.05 | -1.96  |
| GC | GG | -0.7  | 0.00 ± 0.05  | -13.49 | -0.59 ± 0.05 | -2.14  |
| CG | AA | -0.03 | 0.01 ± 0.07  | -0.59  | -0.11 ± 0.17 | 0.45   |
| CG | TT | -0.03 | -0.00 ± 0.10 | -0.33  | -0.08 ± 0.13 | 0.38   |
| CG | AT | 0.49  | -0.03 ± 0.12 | 4.53   | 0.09 ± 0.15  | 2.66   |
| CG | TA | 0.26  | 0.04 ± 0.1   | 2.21   | 0.08 ± 0.16  | 1.09   |
| CG | AC | 0.56  | 0.06 ± 0.09  | 5.49   | -0.30 ± 0.15 | 5.8    |
| CG | CA | -0.75 | 0.02 ± 0.08  | -9.34  | -0.30 ± 0.16 | -2.76  |
| CG | TG | -0.75 | 0.01 ± 0.11  | -7.00  | -0.38 ± 0.08 | -4.33  |
| CG | GT | 0.56  | -0.02 ± 0.06 | 9.68   | -0.31 ± 0.11 | 7.58   |
| CG | AG | -0.8  | 0.03 ± 0.08  | -10.05 | 0.34 ± 0.13  | -8.80  |
| CG | GA | 0.57  | 0.00 ± 0.07  | 8.41   | 0.29 ± 0.07  | 3.84   |
| CG | TC | 0.57  | 0.00 ± 0.06  | 8.85   | 0.32 ± 0.15  | 1.71   |
| CG | CT | -0.8  | 0.02 ± 0.09  | -8.88  | 0.36 ± 0.09  | -12.75 |
| CG | CC | -0.82 | -0.03 ± 0.10 | -7.65  | -0.59 ± 0.07 | -3.23  |
| CG | GG | -0.82 | -0.03 ± 0.10 | -8.05  | -0.59 ± 0.05 | -4.96  |

**Table S3: Correlation values between dinucleotide content and attributes:** Pearson correlation values between normalized chromosomal dinucleotide contents and attributes (genes: content genes, CDS: content of CDS, G+C: G+C content, enhancer: normalized enhancer counts, see 2.2 for details) for empirical dinucleotide contents and model contents (Chargaff binomial model).

| dinucleotide | correlated | empirical | Chargaf model |
|--------------|------------|-----------|---------------|
|--------------|------------|-----------|---------------|

|    | attribute | correlation<br>value | Correlation<br>value |             |
|----|-----------|----------------------|----------------------|-------------|
| AA | genes     | -0.009               | 0.014                | $\pm 0.027$ |
| AA | CDS       | -0.135               | 0.014                | $\pm 0.037$ |
| AA | enhancer  | 0.004                | -0.004               | $\pm 0.084$ |
| AA | G+C       | -0.300               | 0.006                | $\pm 0.025$ |
| AA | length    | 0.030                | -0.004               | $\pm 0.012$ |
| TT | genes     | -0.007               | -0.003               | $\pm 0.023$ |
| TT | CDS       | -0.134               | -0.001               | $\pm 0.028$ |
| TT | enhancer  | 0.009                | 0.007                | $\pm 0.080$ |
| TT | G+C       | -0.300               | 0.010                | $\pm 0.017$ |
| TT | length    | 0.031                | -0.002               | $\pm 0.012$ |
| AT | genes     | 0.007                | -0.012               | $\pm 0.029$ |
| AT | CDS       | 0.367                | -0.015               | $\pm 0.039$ |
| AT | enhancer  | -0.093               | -0.038               | $\pm 0.058$ |
| AT | G+C       | -0.009               | -0.019               | $\pm 0.021$ |
| AT | length    | -0.200               | 0.003                | $\pm 0.017$ |
| TA | genes     | -0.073               | 0.002                | $\pm 0.014$ |
| TA | CDS       | 0.007                | 0.000                | $\pm 0.022$ |
| TA | enhancer  | -0.019               | -0.003               | $\pm 0.055$ |
| TA | G+C       | 0.021                | -0.007               | $\pm 0.024$ |
| TA | length    | -0.016               | 0.004                | $\pm 0.011$ |
| AC | genes     | 0.214                | 0.000                | $\pm 0.033$ |
| AC | CDS       | 0.289                | -0.001               | $\pm 0.039$ |
| AC | enhancer  | -0.055               | -0.011               | $\pm 0.075$ |
| AC | G+C       | 0.178                | 0.005                | $\pm 0.028$ |
| AC | length    | -0.194               | -0.002               | $\pm 0.013$ |
| CA | genes     | -0.072               | 0.008                | $\pm 0.018$ |
| CA | CDS       | -0.396               | 0.013                | $\pm 0.026$ |
| CA | enhancer  | 0.081                | -0.031               | $\pm 0.084$ |
| CA | G+C       | -0.017               | 0.012                | $\pm 0.027$ |
| CA | length    | 0.198                | -0.004               | $\pm 0.013$ |
| TG | genes     | -0.072               | 0.003                | $\pm 0.020$ |
| TG | CDS       | -0.395               | 0.007                | $\pm 0.021$ |
| TG | enhancer  | 0.082                | -0.006               | $\pm 0.074$ |
| TG | G+C       | -0.016               | -0.000               | $\pm 0.031$ |
| TG | length    | 0.197                | -0.004               | $\pm 0.011$ |
| GT | genes     | 0.211                | 0.013                | $\pm 0.019$ |
| GT | CDS       | 0.283                | 0.020                | $\pm 0.032$ |
| GT | enhancer  | -0.060               | -0.022               | $\pm 0.070$ |
| GT | G+C       | 0.170                | 0.009                | $\pm 0.035$ |
| GT | length    | -0.193               | -0.009               | $\pm 0.013$ |
| AG | genes     | -0.148               | -0.005               | $\pm 0.021$ |
| AG | CDS       | -0.406               | -0.007               | $\pm 0.027$ |
| AG | enhancer  | 0.064                | 0.014                | $\pm 0.054$ |
| AG | G+C       | 0.155                | -0.004               | $\pm 0.024$ |
| AG | length    | 0.286                | 0.003                | $\pm 0.012$ |
| GA | genes     | 0.181                | 0.007                | $\pm 0.023$ |
| GA | CDS       | 0.593                | 0.014                | $\pm 0.032$ |

|    |          |        |        |         |
|----|----------|--------|--------|---------|
| GA | enhancer | -0.087 | -0.008 | ± 0.098 |
| GA | G+C      | 0.322  | 0.004  | ± 0.023 |
| GA | length   | -0.240 | -0.006 | ± 0.010 |
| TC | genes    | 0.179  | -0.008 | ± 0.022 |
| TC | CDS      | 0.592  | -0.009 | ± 0.030 |
| TC | enhancer | -0.097 | -0.019 | ± 0.084 |
| TC | G+C      | 0.321  | -0.003 | ± 0.030 |
| TC | length   | -0.240 | 0.001  | 0.011   |
| CT | genes    | -0.147 | 0.009  | 0.020   |
| CT | CDS      | -0.403 | -0.007 | 0.030   |
| CT | enhancer | 0.063  | -0.012 | 0.082   |
| CT | G+C      | 0.160  | -0.005 | 0.023   |
| CT | length   | 0.284  | 0.003  | 0.015   |
| CC | genes    | -0.300 | 0.000  | 0.030   |
| CC | CDS      | -0.613 | -0.008 | 0.023   |
| CC | enhancer | -0.006 | 0.001  | 0.110   |
| CC | G+C      | -0.524 | -0.008 | 0.032   |
| CC | length   | 0.319  | 0.004  | 0.011   |
| GG | genes    | -0.300 | -0.004 | 0.026   |
| GG | CDS      | -0.612 | -0.007 | 0.042   |
| GG | enhancer | -0.008 | -0.019 | 0.056   |
| GG | G+C      | -0.522 | 0.015  | 0.032   |
| GG | length   | 0.319  | 0.002  | 0.015   |
| GC | genes    | 0.181  | -0.017 | 0.012   |
| GC | CDS      | 0.274  | -0.016 | 0.022   |
| GC | enhancer | 0.114  | 0.017  | 0.070   |
| GC | G+C      | 0.468  | -0.002 | 0.030   |
| GC | length   | -0.172 | 0.005  | 0.011   |
| CG | genes    | 0.243  | 0.000  | 0.016   |
| CG | CDS      | 0.620  | 0.004  | 0.035   |
| CG | enhancer | -0.058 | 0.006  | 0.076   |
| CG | G+C      | 0.236  | 0.004  | 0.033   |
| CG | length   | -0.347 | -0.002 | 0.015   |

**Table S4: Relative DNA property changes induced by dinucleotide contents:** mean values of relative changes (change divided by original value) of physical/structural DNA properties for each dinucleotide (see 2.7 for details on calculations).

| id  | property name         | AA           | TT           | AT           | TA           | AC          | GT           | CA          | TG           | AG           | TC           | GA           | CT           | CC           | GG           | GC           | CG           |
|-----|-----------------------|--------------|--------------|--------------|--------------|-------------|--------------|-------------|--------------|--------------|--------------|--------------|--------------|--------------|--------------|--------------|--------------|
| 79  | Adenine content (79)  | 0.23 ± 0.03  | -0.09 ± 0.03 | 0.05 ± 0.0   | 0.04 ± 0.01  | 0.04 ± 0.02 | -0.05 ± 0.01 | 0.05 ± 0.02 | -0.07 ± 0.01 | 0.05 ± 0.02  | -0.06 ± 0.01 | 0.05 ± 0.02  | -0.06 ± 0.01 | -0.05 ± 0.02 | -0.05 ± 0.02 | -0.05 ± 0.02 | -0.03 ± 0.03 |
| 4   | Bend (4)              | -0.0 ± 0.0   | -0.0 ± 0.0   | -0.01 ± 0.01 | 0.07 ± 0.02  | -0.0 ± 0.0  | -0.0 ± 0.0   | 0.01 ± 0.0  | 0.01 ± 0.0   | -0.02 ± 0.0  | -0.01 ± 0.0  | -0.01 ± 0.0  | -0.02 ± 0.0  | -0.02 ± 0.0  | -0.02 ± 0.0  | -0.0 ± 0.0   | -0.0 ± 0.0   |
| 21  | Clash Strength (21)   | -0.04 ± 0.01 | -0.04 ± 0.01 | 0.05 ± 0.02  | -0.06 ± 0.03 | -0.01 ± 0.0 | -0.01 ± 0.0  | -0.02 ± 0.0 | -0.02 ± 0.0  | 0.09 ± 0.01  | -0.06 ± 0.01 | -0.06 ± 0.01 | 0.09 ± 0.01  | 0.03 ± 0.01  | 0.03 ± 0.01  | -0.04 ± 0.02 | 0.04 ± 0.03  |
| 81  | Cytosine content (81) | -0.09 ± 0.03 | -0.09 ± 0.03 | -0.08 ± 0.03 | -0.06 ± 0.02 | 0.07 ± 0.02 | -0.05 ± 0.01 | 0.1 ± 0.03  | -0.07 ± 0.01 | -0.06 ± 0.01 | 0.09 ± 0.02  | -0.06 ± 0.01 | 0.09 ± 0.02  | 0.18 ± 0.03  | -0.05 ± 0.02 | 0.06 ± 0.01  | 0.04 ± 0.02  |
| 100 | Direction (100)       | -2.39 ± 4.5  | 2.2 ± 4.17   | -0.08 ± 0.03 | -0.06 ± 0.03 | 0.98 ± 0.96 | -1.08 ± 0.93 | -0.66 ± 0.5 | 0.52 ± 0.49  | -0.04 ± 0.02 | -1.05 ± 0.79 | 0.93 ± 0.85  | -0.08 ± 0.02 | -0.4 ± 0.16  | 0.3 ± 0.16   | 0.96 ± 0.25  | -0.03 ± 0.03 |
| 123 | Enthalpy (123)        | -0.01 ± 0.0  | -0.01 ± 0.0  | -0.01 ± 0.0  | -0.01 ± 0.0  | 0.0 ± 0.0   | 0.0 ± 0.0    | 0.0 ± 0.0   | 0.0 ± 0.0    | -0.0 ± 0.0   | 0.0 ± 0.0    | 0.0 ± 0.0    | -0.0 ± 0.0   | -0.0 ± 0.0   | -0.0 ± 0.0   | 0.01 ± 0.0   | 0.01 ± 0.01  |

|     |                            |                  |                 |              |              |               |              |                 |                  |                  |                 |                  |                 |                 |                |              |              |
|-----|----------------------------|------------------|-----------------|--------------|--------------|---------------|--------------|-----------------|------------------|------------------|-----------------|------------------|-----------------|-----------------|----------------|--------------|--------------|
| 22  | Enthalpy (22)              | -0.0 ± 0.0       | -0.0 ± 0.0      | -0.03 ± 0.01 | -0.01 ± 0.0  | 0.01 ± 0.0    | 0.01 ± 0.0   | -0.0 ± 0.0      | -0.0 ± 0.0       | -0.01 ± 0.0      | 0.0 ± 0.0       | 0.0 ± 0.0        | -0.01 ± 0.0     | 0.01 ± 0.0      | 0.01 ± 0.0     | 0.01 ± 0.0   | 0.01 ± 0.0   |
| 110 | Enthalpy (RNA) (110)       | -0.02 ± 0.0      | -0.02 ± 0.0     | -0.03 ± 0.01 | -0.01 ± 0.0  | 0.01 ± 0.0    | 0.01 ± 0.0   | 0.01 ± 0.0      | -0.01 ± 0.0      | -0.01 ± 0.0      | 0.01 ± 0.0      | 0.03 ± 0.0       | -0.01 ± 0.0     | 0.02 ± 0.0      | 0.02 ± 0.0     | 0.03 ± 0.01  | -0.0 ± 0.01  |
| 114 | Enthalpy (RNA) (114)       | -0.03 ± 0.01     | -0.03 ± 0.01    | -0.01 ± 0.0  | -0.02 ± 0.0  | 0.01 ± 0.0    | 0.01 ± 0.0   | 0.0 ± 0.0       | 0.0 ± 0.0        | 0.0 ± 0.0        | 0.01 ± 0.0      | 0.01 ± 0.0       | 0.0 ± 0.0       | 0.01 ± 0.0      | 0.01 ± 0.0     | 0.02 ± 0.01  | -0.0 ± 0.0   |
| 124 | Entropy (124)              | -0.0 ± 0.0       | -0.0 ± 0.0      | -0.01 ± 0.0  | -0.0 ± 0.0   | 0.0 ± 0.0     | 0.0 ± 0.0    | 0.0 ± 0.0       | 0.0 ± 0.0        | -0.0 ± 0.0       | 0.0 ± 0.0       | 0.0 ± 0.0        | -0.0 ± 0.0      | -0.0 ± 0.0      | -0.0 ± 0.0     | 0.01 ± 0.0   | 0.01 ± 0.01  |
| 23  | Entropy (23)               | 0.0 ± 0.0        | 0.0 ± 0.0       | -0.02 ± 0.01 | -0.01 ± 0.0  | 0.01 ± 0.0    | 0.01 ± 0.0   | -0.0 ± 0.0      | -0.0 ± 0.0       | -0.02 ± 0.0      | 0.0 ± 0.0       | 0.0 ± 0.0        | -0.02 ± 0.0     | 0.01 ± 0.0      | 0.01 ± 0.0     | 0.01 ± 0.0   | 0.01 ± 0.01  |
| 111 | Entropy (RNA) (111)        | -0.02 ± 0.0      | -0.02 ± 0.0     | -0.03 ± 0.01 | -0.0 ± 0.0   | 0.01 ± 0.0    | 0.01 ± 0.0   | 0.01 ± 0.0      | -0.01 ± 0.0      | -0.01 ± 0.0      | 0.01 ± 0.0      | 0.03 ± 0.0       | -0.01 ± 0.0     | 0.01 ± 0.0      | 0.01 ± 0.0     | 0.02 ± 0.01  | -0.01 ± 0.01 |
| 115 | Entropy (RNA) (115)        | -0.03 ± 0.01     | -0.03 ± 0.01    | -0.0 ± 0.0   | -0.01 ± 0.0  | 0.0 ± 0.0     | 0.0 ± 0.0    | -0.0 ± 0.0      | -0.0 ± 0.0       | 0.0 ± 0.0        | 0.01 ± 0.0      | 0.01 ± 0.0       | 0.0 ± 0.0       | 0.01 ± 0.0      | 0.01 ± 0.0     | 0.02 ± 0.01  | -0.0 ± 0.0   |
| 122 | Flexibility_shift (122)    | -0.01 ± 0.0      | -0.01 ± 0.0     | -0.06 ± 0.02 | -0.02 ± 0.01 | 0.03 ± 0.0    | 0.03 ± 0.0   | -0.02 ± 0.0     | -0.02 ± 0.0      | 0.03 ± 0.0       | -0.01 ± 0.0     | -0.01 ± 0.0      | 0.03 ± 0.0      | -0.0 ± 0.0      | -0.0 ± 0.0     | -0.03 ± 0.02 | 0.03 ± 0.03  |
| 121 | Flexibility_slide (121)    | 0.06 ± 0.01      | 0.06 ± 0.01     | 0.03 ± 0.0   | -0.01 ± 0.01 | 0.01 ± 0.0    | 0.01 ± 0.0   | -0.06 ± 0.01    | -0.06 ± 0.01     | -0.01 ± 0.0      | 0.01 ± 0.01     | 0.01 ± 0.01      | -0.01 ± 0.0     | -0.01 ± 0.0     | -0.01 ± 0.0    | -0.02 ± 0.01 | -0.02 ± 0.01 |
| 125 | Free energy (125)          | -0.02 ± 0.0      | -0.02 ± 0.0     | -0.02 ± 0.0  | -0.03 ± 0.01 | 0.0 ± 0.0     | 0.0 ± 0.0    | 0.01 ± 0.0      | 0.01 ± 0.0       | -0.0 ± 0.0       | -0.0 ± 0.0      | -0.0 ± 0.0       | -0.0 ± 0.0      | 0.02 ± 0.0      | 0.02 ± 0.0     | 0.03 ± 0.01  | 0.02 ± 0.01  |
| 34  | Free energy (34)           | -0.04 ± 0.01     | -0.04 ± 0.01    | -0.03 ± 0.01 | -0.02 ± 0.01 | 0.01 ± 0.0    | 0.01 ± 0.0   | 0.0 ± 0.01      | 0.0 ± 0.01       | 0.0 ± 0.0        | 0.0 ± 0.0       | 0.0 ± 0.0        | 0.0 ± 0.0       | 0.02 ± 0.0      | 0.02 ± 0.0     | 0.03 ± 0.01  | 0.02 ± 0.01  |
| 35  | Free energy (35)           | 0.0 ± 0.01       | 0.0 ± 0.01      | -0.02 ± 0.0  | -0.03 ± 0.01 | -0.02 ± 0.0   | -0.02 ± 0.0  | 0.01 ± 0.0      | 0.01 ± 0.0       | -0.01 ± 0.0      | -0.01 ± 0.0     | -0.01 ± 0.0      | -0.01 ± 0.0     | 0.03 ± 0.01     | 0.03 ± 0.01    | 0.03 ± 0.01  | 0.03 ± 0.02  |
| 36  | Free energy (36)           | -0.02 ± 0.0      | -0.02 ± 0.0     | -0.03 ± 0.01 | -0.02 ± 0.01 | 0.01 ± 0.0    | 0.01 ± 0.0   | 0.01 ± 0.0      | 0.01 ± 0.0       | -0.0 ± 0.0       | -0.0 ± 0.0      | 0.0 ± 0.0        | -0.0 ± 0.0      | 0.02 ± 0.0      | 0.02 ± 0.0     | 0.03 ± 0.01  | 0.02 ± 0.01  |
| 38  | Free energy (38)           | -0.04 ± 0.01     | -0.04 ± 0.01    | -0.05 ± 0.01 | -0.05 ± 0.02 | 0.01 ± 0.01   | 0.01 ± 0.01  | 0.01 ± 0.01     | 0.01 ± 0.01      | 0.0 ± 0.01       | 0.01 ± 0.01     | 0.01 ± 0.01      | 0.0 ± 0.01      | 0.02 ± 0.0      | 0.02 ± 0.0     | 0.04 ± 0.01  | 0.03 ± 0.02  |
| 72  | Free energy (72)           | -0.02 ± 0.0      | -0.02 ± 0.0     | -0.03 ± 0.01 | -0.03 ± 0.01 | -0.0 ± 0.0    | -0.0 ± 0.0   | 0.01 ± 0.0      | 0.01 ± 0.0       | -0.0 ± 0.0       | -0.0 ± 0.0      | -0.0 ± 0.0       | -0.0 ± 0.0      | 0.02 ± 0.0      | 0.02 ± 0.0     | 0.02 ± 0.01  | 0.03 ± 0.02  |
| 73  | Free energy (73)           | -0.02 ± 0.0      | -0.02 ± 0.0     | -0.02 ± 0.0  | -0.03 ± 0.01 | 0.0 ± 0.0     | 0.0 ± 0.0    | 0.01 ± 0.0      | 0.01 ± 0.0       | -0.0 ± 0.0       | -0.0 ± 0.0      | -0.0 ± 0.0       | -0.0 ± 0.0      | 0.02 ± 0.0      | 0.02 ± 0.0     | 0.03 ± 0.01  | 0.02 ± 0.01  |
| 74  | Free energy (74)           | -0.02 ± 0.0      | -0.02 ± 0.0     | -0.03 ± 0.01 | -0.02 ± 0.01 | 0.0 ± 0.0     | 0.0 ± 0.0    | 0.02 ± 0.0      | 0.02 ± 0.0       | -0.01 ± 0.0      | 0.0 ± 0.0       | 0.0 ± 0.0        | -0.01 ± 0.0     | 0.01 ± 0.0      | 0.01 ± 0.0     | 0.03 ± 0.01  | 0.02 ± 0.01  |
| 75  | Free energy (75)           | -0.02 ± 0.0      | -0.02 ± 0.0     | -0.03 ± 0.0  | -0.03 ± 0.01 | -0.0 ± 0.0    | -0.0 ± 0.0   | 0.01 ± 0.0      | 0.01 ± 0.0       | 0.0 ± 0.0        | 0.0 ± 0.0       | 0.0 ± 0.0        | 0.0 ± 0.0       | 0.02 ± 0.0      | 0.02 ± 0.0     | 0.02 ± 0.0   | 0.01 ± 0.01  |
| 112 | Free energy (RNA) (112)    | -0.04 ± 0.01     | -0.04 ± 0.01    | -0.04 ± 0.01 | -0.02 ± 0.01 | 0.01 ± 0.0    | 0.01 ± 0.0   | 0.0 ± 0.01      | -0.0 ± 0.01      | -0.0 ± 0.0       | 0.01 ± 0.01     | 0.02 ± 0.01      | -0.0 ± 0.0      | 0.03 ± 0.0      | 0.03 ± 0.0     | 0.04 ± 0.01  | 0.0 ± 0.0    |
| 113 | Free energy (RNA) (113)    | -0.05 ± 0.01     | -0.05 ± 0.01    | -0.03 ± 0.01 | -0.02 ± 0.0  | 0.01 ± 0.0    | 0.01 ± 0.0   | 0.0 ± 0.01      | 0.0 ± 0.01       | 0.0 ± 0.0        | 0.01 ± 0.01     | 0.01 ± 0.01      | 0.0 ± 0.0       | 0.03 ± 0.0      | 0.03 ± 0.0     | 0.03 ± 0.01  | 0.0 ± 0.0    |
| 76  | GC content (76)            | -0.09 ± 0.03     | -0.09 ± 0.03    | -0.08 ± 0.03 | -0.06 ± 0.02 | 0.01 ± 0.01   | 0.01 ± 0.01  | 0.01 ± 0.02     | 0.01 ± 0.02      | 0.01 ± 0.01      | 0.01 ± 0.01     | 0.01 ± 0.01      | 0.01 ± 0.01     | 0.06 ± 0.01     | 0.06 ± 0.01    | 0.06 ± 0.01  | 0.04 ± 0.02  |
| 80  | Guanine content (80)       | -0.09 ± 0.03     | -0.09 ± 0.03    | -0.08 ± 0.03 | -0.06 ± 0.02 | -0.05 ± 0.01  | 0.07 ± 0.02  | -0.07 ± 0.01    | 0.1 ± 0.03       | 0.09 ± 0.02      | -0.06 ± 0.01    | 0.09 ± 0.02      | -0.06 ± 0.01    | -0.05 ± 0.02    | 0.18 ± 0.03    | 0.06 ± 0.01  | 0.04 ± 0.02  |
| 29  | Hydrophilicity (RNA) (29)  | -0.08 ± 0.02     | 0.12 ± 0.04     | -0.04 ± 0.01 | -0.02 ± 0.01 | -0.03 ± 0.0   | -0.0 ± 0.0   | -0.02 ± 0.0     | 0.02 ± 0.0       | -0.05 ± 0.01     | 0.07 ± 0.01     | -0.04 ± 0.01     | 0.07 ± 0.01     | 0.05 ± 0.01     | -0.03 ± 0.01   | -0.01 ± 0.0  | 0.0 ± 0.0    |
| 31  | Hydrophilicity (RNA) (31)  | -0.08 ± 0.02     | 0.07 ± 0.02     | -0.03 ± 0.01 | -0.01 ± 0.0  | -0.02 ± 0.0   | 0.0 ± 0.0    | -0.01 ± 0.0     | 0.02 ± 0.0       | -0.04 ± 0.01     | 0.05 ± 0.0      | -0.04 ± 0.0      | 0.06 ± 0.01     | 0.04 ± 0.01     | -0.02 ± 0.01   | -0.0 ± 0.0   | 0.01 ± 0.01  |
| 6   | Inclination (6)            | -17.39 ± 9309.53 | 18.01 ± 9304.96 | -0.07 ± 0.64 | -0.06 ± 0.53 | -2.14 ± 411.8 | 2.06 ± 411.5 | 61.23 ± 7112.29 | -61.16 ± 7100.99 | -50.21 ± 4606.19 | 10.32 ± 1411.37 | -10.27 ± 1409.15 | 50.33 ± 4608.17 | -65.5 ± 4882.08 | 65.1 ± 4872.58 | -0.03 ± 0.45 | -0.02 ± 0.34 |
| 78  | Keto (GT) content (78)     | -0.09 ± 0.03     | 0.12 ± 0.03     | 0.01 ± 0.0   | 0.01 ± 0.0   | -0.05 ± 0.01  | 0.07 ± 0.01  | -0.07 ± 0.01    | 0.01 ± 0.0       | -0.06 ± 0.01     | 0.01 ± 0.0      | 0.01 ± 0.0       | 0.01 ± 0.0      | -0.05 ± 0.02    | 0.06 ± 0.02    | 0.01 ± 0.0   | 0.0 ± 0.0    |
| 8   | Major Groove Depth (8)     | 0.0 ± 0.0        | 0.0 ± 0.0       | -0.0 ± 0.0   | 0.0 ± 0.0    | 0.0 ± 0.0     | 0.0 ± 0.0    | -0.0 ± 0.0      | -0.0 ± 0.0       | -0.0 ± 0.0       | -0.0 ± 0.0      | -0.0 ± 0.0       | -0.0 ± 0.0      | -0.0 ± 0.0      | -0.0 ± 0.0     | -0.0 ± 0.0   | -0.0 ± 0.0   |
| 10  | Major Groove Distance (10) | -0.0 ± 0.0       | -0.0 ± 0.0      | -0.01 ± 0.0  | 0.01 ± 0.0   | -0.01 ± 0.0   | -0.01 ± 0.0  | 0.01 ± 0.0      | 0.01 ± 0.0       | -0.0 ± 0.0       | 0.0 ± 0.0       | 0.0 ± 0.0        | -0.0 ± 0.0      | -0.0 ± 0.0      | -0.0 ± 0.0     | -0.01 ± 0.0  | 0.0 ± 0.0    |
| 9   | Major Groove Size (9)      | 0.0 ± 0.0        | 0.0 ± 0.0       | 0.01 ± 0.0   | -0.01 ± 0.0  | 0.0 ± 0.0     | 0.0 ± 0.0    | 0.0 ± 0.0       | 0.0 ± 0.0        | 0.01 ± 0.0       | -0.01 ± 0.0     | -0.01 ± 0.0      | 0.01 ± 0.0      | 0.0 ± 0.0       | 0.0 ± 0.0      | -0.01 ± 0.0  | 0.01 ± 0.01  |
| 7   | Major Groove Width (7)     | -0.01 ± 0.0      | -0.01 ± 0.0     | -0.0 ± 0.0   | -0.0 ± 0.0   | -0.0 ± 0.0    | -0.0 ± 0.0   | 0.0 ± 0.0       | 0.0 ± 0.0        | 0.0 ± 0.0        | 0.0 ± 0.0       | 0.0 ± 0.0        | 0.0 ± 0.0       | 0.01 ± 0.0      | 0.01 ± 0.0     | 0.0 ± 0.0    | 0.0 ± 0.0    |
| 108 | Melting Temperature (108)  | -0.0 ± 0.0       | -0.0 ± 0.0      | -0.0 ± 0.0   | -0.01 ± 0.0  | 0.0 ± 0.0     | 0.0 ± 0.0    | -0.0 ± 0.0      | -0.0 ± 0.0       | -0.0 ± 0.0       | 0.0 ± 0.0       | 0.0 ± 0.0        | -0.0 ± 0.0      | 0.0 ± 0.0       | 0.0 ± 0.0      | 0.01 ± 0.0   | -0.0 ± 0.0   |

|     |                                             |              |              |               |               |               |               |               |              |              |               |               |              |              |              |               |               |
|-----|---------------------------------------------|--------------|--------------|---------------|---------------|---------------|---------------|---------------|--------------|--------------|---------------|---------------|--------------|--------------|--------------|---------------|---------------|
| 16  | Melting Temperature (16)                    | -0.02 ± 0.0  | -0.02 ± 0.0  | -0.01 ± 0.0   | -0.03 ± 0.01  | 0.02 ± 0.0    | 0.02 ± 0.0    | -0.02 ± 0.0   | -0.02 ± 0.0  | -0.01 ± 0.0  | 0.01 ± 0.0    | 0.01 ± 0.0    | -0.01 ± 0.0  | 0.01 ± 0.0   | 0.01 ± 0.0   | 0.04 ± 0.01   | -0.0 ± 0.0    |
| 12  | Minor Groove Depth (12)                     | 0.0 ± 0.0    | 0.0 ± 0.0    | -0.0 ± 0.0    | 0.0 ± 0.0     | -0.0 ± 0.0    | -0.0 ± 0.0    | 0.0 ± 0.0     | 0.0 ± 0.0    | -0.0 ± 0.0   | 0.0 ± 0.0     | 0.0 ± 0.0     | -0.0 ± 0.0   | -0.0 ± 0.0   | -0.0 ± 0.0   | -0.0 ± 0.0    | 0.0 ± 0.0     |
| 14  | Minor Groove Distance (14)                  | -0.01 ± 0.0  | -0.01 ± 0.0  | 0.02 ± 0.01   | -0.01 ± 0.0   | 0.02 ± 0.0    | 0.02 ± 0.0    | -0.0 ± 0.0    | -0.0 ± 0.0   | -0.01 ± 0.0  | -0.01 ± 0.0   | -0.01 ± 0.0   | -0.01 ± 0.0  | -0.01 ± 0.0  | -0.01 ± 0.0  | 0.01 ± 0.01   | -0.0 ± 0.0    |
| 13  | Minor Groove Size (13)                      | -0.01 ± 0.0  | -0.01 ± 0.0  | -0.0 ± 0.0    | -0.01 ± 0.0   | -0.0 ± 0.0    | -0.0 ± 0.0    | 0.01 ± 0.0    | 0.01 ± 0.0   | 0.01 ± 0.0   | -0.01 ± 0.0   | -0.01 ± 0.0   | 0.01 ± 0.0   | 0.01 ± 0.0   | 0.01 ± 0.0   | -0.0 ± 0.0    | 0.01 ± 0.01   |
| 11  | Minor Groove Width (11)                     | 0.0 ± 0.0    | 0.0 ± 0.0    | 0.0 ± 0.0     | 0.01 ± 0.0    | 0.01 ± 0.0    | 0.01 ± 0.0    | -0.01 ± 0.0   | -0.01 ± 0.0  | -0.0 ± 0.0   | -0.01 ± 0.0   | -0.01 ± 0.0   | -0.0 ± 0.0   | -0.01 ± 0.0  | -0.01 ± 0.0  | -0.0 ± 0.0    | 0.0 ± 0.0     |
| 18  | Mobility to bend towards major groove (18)  | 0.01 ± 0.0   | 0.0 ± 0.0    | 0.0 ± 0.0     | 0.0 ± 0.0     | 0.0 ± 0.0     | -0.0 ± 0.0    | 0.0 ± 0.0     | -0.0 ± 0.0   | 0.0 ± 0.0    | -0.0 ± 0.0    | 0.0 ± 0.0     | -0.0 ± 0.0   | -0.0 ± 0.0   | -0.0 ± 0.0   | -0.0 ± 0.0    | -0.0 ± 0.0    |
| 19  | Mobility to bend towards minor groove (19)  | -0.01 ± 0.0  | -0.01 ± 0.0  | -0.01 ± 0.0   | -0.0 ± 0.0    | -0.0 ± 0.0    | -0.0 ± 0.0    | 0.0 ± 0.0     | 0.01 ± 0.0   | -0.0 ± 0.0   | 0.0 ± 0.0     | -0.0 ± 0.0    | 0.0 ± 0.0    | 0.01 ± 0.0   | 0.01 ± 0.0   | 0.0 ± 0.0     | 0.0 ± 0.0     |
| 15  | Persistence Length (15)                     | -0.03 ± 0.01 | -0.03 ± 0.01 | -0.05 ± 0.01  | -0.04 ± 0.01  | 0.0 ± 0.01    | 0.0 ± 0.01    | 0.0 ± 0.01    | 0.0 ± 0.01   | 0.0 ± 0.01   | 0.0 ± 0.01    | 0.0 ± 0.01    | 0.0 ± 0.01   | 0.0 ± 0.01   | 0.06 ± 0.01  | 0.06 ± 0.01   | 0.02 ± 0.0    |
| 17  | Probability contacting nucleosome core (17) | 0.05 ± 0.01  | 0.05 ± 0.01  | -0.03 ± 0.01  | -0.03 ± 0.01  | -0.01 ± 0.0   | -0.01 ± 0.0   | 0.02 ± 0.0    | 0.02 ± 0.0   | 0.01 ± 0.0   | -0.0 ± 0.0    | -0.0 ± 0.0    | 0.02 ± 0.0   | -0.01 ± 0.0  | -0.01 ± 0.0  | -0.03 ± 0.01  | -0.03 ± 0.03  |
| 20  | Propeller Twist (20)                        | 0.03 ± 0.01  | 0.03 ± 0.01  | 0.02 ± 0.0    | -0.01 ± 0.01  | -0.03 ± 0.0   | -0.03 ± 0.0   | -0.02 ± 0.0   | -0.02 ± 0.0  | 0.01 ± 0.0   | 0.01 ± 0.0    | 0.01 ± 0.0    | 0.01 ± 0.0   | 0.01 ± 0.0   | 0.0 ± 0.0    | 0.0 ± 0.0     | -0.0 ± 0.0    |
| 77  | Purine (AG) content (77)                    | 0.09 ± 0.03  | -0.09 ± 0.03 | 0.0 ± 0.0     | 0.0 ± 0.0     | 0.0 ± 0.0     | 0.0 ± 0.0     | 0.0 ± 0.0     | 0.0 ± 0.0    | 0.06 ± 0.01  | -0.06 ± 0.01  | 0.06 ± 0.01   | -0.06 ± 0.01 | -0.05 ± 0.02 | 0.05 ± 0.02  | 0.0 ± 0.0     | 0.0 ± 0.0     |
| 3   | Rise (3)                                    | -0.01 ± 0.0  | -0.01 ± 0.0  | 0.01 ± 0.0    | -0.0 ± 0.0    | -0.0 ± 0.0    | -0.0 ± 0.0    | -0.01 ± 0.0   | -0.01 ± 0.0  | 0.0 ± 0.0    | -0.0 ± 0.0    | -0.0 ± 0.0    | 0.0 ± 0.0    | 0.01 ± 0.0   | 0.01 ± 0.0   | 0.0 ± 0.0     | 0.0 ± 0.0     |
| 66  | Rise (66)                                   | -0.0 ± 0.0   | -0.0 ± 0.0   | -0.0 ± 0.0    | 0.0 ± 0.0     | -0.0 ± 0.0    | -0.0 ± 0.0    | -0.0 ± 0.0    | -0.0 ± 0.0   | -0.0 ± 0.0   | 0.0 ± 0.0     | 0.0 ± 0.0     | 0.0 ± 0.0    | 0.0 ± 0.0    | 0.0 ± 0.0    | 0.0 ± 0.0     | -0.0 ± 0.0    |
| 97  | Rise (97)                                   | -0.0 ± 0.0   | -0.0 ± 0.0   | -0.0 ± 0.0    | 0.0 ± 0.0     | -0.0 ± 0.0    | -0.0 ± 0.0    | 0.0 ± 0.0     | 0.0 ± 0.0    | -0.0 ± 0.0   | -0.0 ± 0.0    | -0.0 ± 0.0    | -0.0 ± 0.0   | 0.0 ± 0.0    | 0.0 ± 0.0    | 0.0 ± 0.0     | 0.0 ± 0.0     |
| 32  | Rise (DNA-protein complex) (32)             | -0.0 ± 0.0   | -0.0 ± 0.0   | -0.0 ± 0.0    | 0.0 ± 0.0     | 0.0 ± 0.0     | 0.0 ± 0.0     | 0.0 ± 0.0     | 0.0 ± 0.0    | 0.0 ± 0.0    | 0.0 ± 0.0     | 0.0 ± 0.0     | 0.0 ± 0.0    | 0.0 ± 0.0    | 0.0 ± 0.0    | 0.0 ± 0.0     | 0.0 ± 0.0     |
| 87  | Rise (DNA-protein complex) (87)             | -0.0 ± 0.0   | -0.0 ± 0.0   | -0.0 ± 0.0    | 0.0 ± 0.0     | 0.0 ± 0.0     | 0.0 ± 0.0     | -0.0 ± 0.0    | -0.0 ± 0.0   | -0.0 ± 0.0   | 0.0 ± 0.0     | 0.0 ± 0.0     | -0.0 ± 0.0   | 0.0 ± 0.0    | 0.0 ± 0.0    | 0.0 ± 0.0     | 0.0 ± 0.0     |
| 102 | Rise (RNA) (102)                            | -0.0 ± 0.0   | -0.0 ± 0.0   | -0.0 ± 0.0    | 0.0 ± 0.0     | -0.0 ± 0.0    | -0.0 ± 0.0    | -0.0 ± 0.0    | -0.0 ± 0.0   | 0.0 ± 0.0    | 0.0 ± 0.0     | 0.0 ± 0.0     | 0.0 ± 0.0    | 0.0 ± 0.0    | 0.0 ± 0.0    | -0.0 ± 0.0    | 0.0 ± 0.0     |
| 107 | Rise stiffness (107)                        | -0.0 ± 0.0   | -0.0 ± 0.0   | 0.01 ± 0.0    | -0.01 ± 0.0   | 0.01 ± 0.0    | 0.01 ± 0.0    | -0.01 ± 0.0   | -0.01 ± 0.0  | -0.01 ± 0.0  | 0.01 ± 0.0    | 0.01 ± 0.0    | -0.01 ± 0.0  | 0.0 ± 0.0    | 0.0 ± 0.0    | 0.01 ± 0.0    | -0.01 ± 0.01  |
| 47  | Rise_roll (47)                              | -0.0 ± 0.0   | -0.0 ± 0.0   | 0.03 ± 0.01   | -0.02 ± 0.01  | 0.02 ± 0.0    | 0.02 ± 0.0    | -0.01 ± 0.0   | -0.01 ± 0.0  | -0.01 ± 0.0  | 0.01 ± 0.0    | 0.01 ± 0.0    | -0.01 ± 0.0  | -0.0 ± 0.0   | -0.0 ± 0.0   | 0.02 ± 0.01   | -0.01 ± 0.01  |
| 116 | Roll (116)                                  | 1.77 ± 96.97 | 1.67 ± 96.12 | 1.7 ± 94.67   | -1.65 ± 83.64 | 0.35 ± 24.89  | 0.31 ± 23.95  | -1.08 ± 79.98 | -0.96 ± 78.4 | -0.12 ± 9.07 | -0.27 ± 18.34 | -0.25 ± 17.92 | -0.13 ± 9.22 | -0.15 ± 10.2 | -0.13 ± 9.78 | 0.4 ± 33.78   | -0.47 ± 23.91 |
| 119 | Roll (119)                                  | 0.01 ± 0.01  | 0.01 ± 0.01  | -0.38 ± 0.14  | 0.19 ± 0.09   | -0.1 ± 0.01   | -0.1 ± 0.01   | 0.17 ± 0.02   | 0.17 ± 0.02  | -0.05 ± 0.01 | 0.08 ± 0.01   | 0.08 ± 0.01   | -0.05 ± 0.01 | -0.02 ± 0.01 | -0.02 ± 0.01 | -0.06 ± 0.03  | 0.06 ± 0.05   |
| 63  | Roll (63)                                   | 0.03 ± 0.03  | 0.03 ± 0.03  | -0.17 ± 0.07  | -0.1 ± 0.05   | 0.01 ± 0.01   | 0.01 ± 0.01   | -0.14 ± 0.02  | -0.14 ± 0.02 | 0.24 ± 0.03  | -0.04 ± 0.01  | -0.04 ± 0.01  | 0.24 ± 0.03  | 0.12 ± 0.02  | 0.12 ± 0.02  | -0.35 ± 0.14  | 0.15 ± 0.11   |
| 90  | Roll (90)                                   | -0.06 ± 0.01 | -0.06 ± 0.01 | -0.12 ± 0.04  | 0.07 ± 0.04   | -0.04 ± 0.01  | -0.04 ± 0.01  | -0.01 ± 0.01  | -0.01 ± 0.01 | 0.07 ± 0.01  | -0.07 ± 0.01  | -0.07 ± 0.01  | 0.07 ± 0.01  | 0.2 ± 0.04   | 0.2 ± 0.03   | -0.32 ± 0.13  | 0.13 ± 0.1    |
| 94  | Roll (94)                                   | -0.07 ± 0.02 | -0.07 ± 0.02 | -0.14 ± 0.05  | 0.1 ± 0.06    | -0.03 ± 0.01  | -0.03 ± 0.01  | -0.04 ± 0.01  | -0.04 ± 0.01 | 0.19 ± 0.02  | -0.14 ± 0.02  | -0.14 ± 0.02  | 0.19 ± 0.02  | 0.22 ± 0.05  | 0.22 ± 0.04  | -0.33 ± 0.16  | 0.06 ± 0.05   |
| 25  | Roll (DNA-protein complex) (25)             | -0.06 ± 0.02 | -0.06 ± 0.02 | -0.08 ± 0.03  | 0.01 ± 0.01   | -0.06 ± 0.01  | -0.06 ± 0.01  | 0.1 ± 0.01    | 0.1 ± 0.01   | 0.07 ± 0.01  | -0.0 ± 0.0    | -0.0 ± 0.0    | 0.07 ± 0.01  | 0.01 ± 0.0   | 0.01 ± 0.0   | -0.09 ± 0.04  | 0.05 ± 0.04   |
| 84  | Roll (DNA-protein complex) (84)             | -0.07 ± 0.02 | -0.07 ± 0.02 | -0.04 ± 0.01  | 0.02 ± 0.02   | -0.04 ± 0.0   | -0.04 ± 0.0   | 0.06 ± 0.01   | 0.06 ± 0.01  | 0.05 ± 0.01  | -0.01 ± 0.0   | -0.01 ± 0.0   | 0.05 ± 0.01  | 0.02 ± 0.0   | 0.02 ± 0.0   | -0.04 ± 0.02  | 0.04 ± 0.03   |
| 104 | Roll (RNA) (104)                            | -0.02 ± 0.0  | -0.02 ± 0.0  | -0.01 ± 0.0   | 0.02 ± 0.01   | -0.02 ± 0.0   | -0.02 ± 0.0   | 0.01 ± 0.0    | 0.01 ± 0.0   | 0.0 ± 0.0    | 0.01 ± 0.0    | 0.01 ± 0.0    | 0.0 ± 0.0    | 0.0 ± 0.0    | 0.02 ± 0.01  | -0.01 ± 0.01  | 0.01 ± 0.01   |
| 69  | Roll stiffness (69)                         | 0.0 ± 0.0    | 0.0 ± 0.0    | 0.01 ± 0.0    | -0.01 ± 0.0   | 0.01 ± 0.0    | 0.01 ± 0.0    | -0.01 ± 0.0   | -0.01 ± 0.0  | -0.0 ± 0.0   | 0.0 ± 0.0     | 0.0 ± 0.0     | -0.0 ± 0.0   | -0.0 ± 0.0   | -0.0 ± 0.0   | 0.02 ± 0.01   | -0.01 ± 0.01  |
| 59  | Roll_roll (59)                              | 2.84 ± 60.22 | 2.84 ± 60.1  | -3.95 ± 86.01 | 1.39 ± 30.72  | -2.95 ± 66.88 | -2.94 ± 66.92 | 3.05 ± 70.35  | 3.04 ± 70.46 | 0.06 ± 2.61  | 0.4 ± 10.48   | 0.4 ± 10.51   | 0.06 ± 2.6   | -0.09 ± 1.52 | -0.09 ± 1.58 | -2.83 ± 76.88 | 0.3 ± 10.55   |
| 41  | Roll_roll (41)                              | 0.01 ± 0.0   | 0.01 ± 0.0   | 0.02 ± 0.01   | -0.02 ± 0.01  | 0.01 ± 0.0    | 0.01 ± 0.0    | -0.01 ± 0.0   | -0.01 ± 0.0  | 0.0 ± 0.0    | -0.0 ± 0.0    | -0.0 ± 0.0    | 0.0 ± 0.0    | 0.0 ± 0.0    | 0.0 ± 0.0    | 0.01 ± 0.01   | -0.01 ± 0.01  |
| 57  | Roll_shift (57)                             | 0.31 ± 0.06  | 0.31 ± 0.06  | 0.11 ± 0.02   | -0.23 ± 0.07  | 0.16 ± 0.06   | 0.16 ± 0.06   | -0.12 ± 0.03  | -0.12 ± 0.03 | -0.33 ± 0.12 | 0.14 ± 0.05   | 0.14 ± 0.05   | -0.33 ± 0.12 | -0.12 ± 0.07 | -0.12 ± 0.07 | -0.07 ± 0.04  | 0.08 ± 0.09   |

|     |                                  |                 |                |               |              |                  |                 |               |                |                  |                 |                 |                 |               |                |              |               |
|-----|----------------------------------|-----------------|----------------|---------------|--------------|------------------|-----------------|---------------|----------------|------------------|-----------------|-----------------|-----------------|---------------|----------------|--------------|---------------|
| 58  | Roll_slide (58)                  | 0.07 ± 0.01     | 0.07 ± 0.01    | 0.23 ± 0.03   | -0.03 ± 0.02 | -0.05 ± 0.0      | -0.05 ± 0.0     | -0.12 ± 0.02  | -0.12 ± 0.02   | 0.09 ± 0.03      | -0.06 ± 0.01    | -0.06 ± 0.01    | 0.09 ± 0.03     | -0.02 ± 0.0   | -0.02 ± 0.0    | -0.08 ± 0.04 | 0.03 ± 0.04   |
| 64  | Shift (64)                       | 2.49 ± 20.28    | 2.5 ± 20.26    | -4.57 ± 38.19 | 5.12 ± 43.84 | -1.83 ± 16.61    | -1.83 ± 16.59   | -0.86 ± 7.69  | -0.86 ± 7.68   | -2.1 ± 19.24     | -0.1 ± 0.76     | -0.1 ± 0.76     | -2.1 ± 19.26    | -1.47 ± 13.58 | -1.47 ± 13.66  | 7.47 ± 66.45 | -0.98 ± 8.87  |
| 95  | Shift (95)                       | -0.12 ± 0.77    | -0.12 ± 0.8    | -0.1 ± 0.66   | -0.08 ± 0.65 | -1.23 ± 7.54     | -1.23 ± 7.84    | -0.77 ± 4.22  | -0.78 ± 4.42   | 2.28 ± 10.79     | -0.07 ± 0.3     | -0.07 ± 0.3     | 2.29 ± 10.89    | -0.06 ± 0.24  | -0.06 ± 0.24   | -0.06 ± 0.23 | -0.05 ± 0.22  |
| 30  | Shift (DNA-protein complex) (30) | 0.37 ± 0.33     | 0.37 ± 0.33    | -0.07 ± 0.03  | -0.05 ± 0.03 | -0.3 ± 0.59      | -0.3 ± 0.6      | -0.06 ± 0.05  | -0.06 ± 0.05   | -0.67 ± 1.18     | 0.88 ± 1.32     | 0.87 ± 1.32     | -0.67 ± 1.19    | -0.04 ± 0.06  | -0.04 ± 0.06   | -0.04 ± 0.08 | -0.02 ± 0.06  |
| 85  | Shift (DNA-protein complex) (85) | 0.71 ± 24.38    | 0.71 ± 24.41   | 0.05 ± 2.17   | 0.04 ± 1.6   | -1.67 ± 56.97    | -1.65 ± 57.12   | -1.27 ± 45.92 | -1.26 ± 46.11  | -1.23 ± 43.14    | 4.89 ± 154.95   | 4.84 ± 155.14   | -1.25 ± 43.14   | -0.53 ± 19.26 | -0.52 ± 19.25  | 0.07 ± 2.96  | 0.08 ± 2.98   |
| 24  | Shift (RNA) (24)                 | -0.32 ± 0.49    | -0.32 ± 0.49   | -0.22 ± 0.33  | -0.11 ± 0.11 | 0.29 ± 0.33      | 0.29 ± 0.32     | 0.14 ± 0.2    | 0.14 ± 0.2     | -0.15 ± 0.08     | 0.05 ± 0.11     | 0.05 ± 0.11     | -0.15 ± 0.08    | -0.08 ± 0.03  | -0.08 ± 0.03   | 0.04 ± 0.04  | 0.21 ± 0.14   |
| 68  | Shift stiffness (68)             | 0.03 ± 0.01     | 0.03 ± 0.01    | -0.02 ± 0.0   | -0.03 ± 0.01 | 0.0 ± 0.0        | 0.0 ± 0.0       | -0.01 ± 0.0   | -0.01 ± 0.0    | 0.01 ± 0.0       | 0.0 ± 0.0       | 0.0 ± 0.0       | 0.01 ± 0.0      | 0.01 ± 0.0    | 0.01 ± 0.0     | -0.0 ± 0.0   | -0.01 ± 0.0   |
| 49  | Shift_rise (49)                  | 0.29 ± 0.08     | 0.29 ± 0.08    | -0.11 ± 0.03  | -0.1 ± 0.04  | -0.06 ± 0.01     | -0.06 ± 0.01    | -0.15 ± 0.02  | -0.15 ± 0.02   | -0.1 ± 0.02      | -0.02 ± 0.01    | -0.02 ± 0.01    | -0.1 ± 0.02     | 0.18 ± 0.05   | 0.18 ± 0.05    | 0.09 ± 0.04  | -0.06 ± 0.06  |
| 45  | Shift_shift (45)                 | 0.02 ± 0.01     | 0.02 ± 0.01    | -0.02 ± 0.01  | -0.0 ± 0.0   | -0.01 ± 0.0      | -0.01 ± 0.0     | -0.0 ± 0.0    | -0.0 ± 0.0     | 0.0 ± 0.0        | -0.01 ± 0.0     | -0.01 ± 0.0     | 0.0 ± 0.0       | 0.01 ± 0.0    | 0.01 ± 0.0     | 0.0 ± 0.0    | -0.01 ± 0.01  |
| 48  | Shift_slide (48)                 | -2.37 ± 31.07   | -2.38 ± 31.11  | 0.89 ± 13.16  | -0.57 ± 7.33 | 0.89 ± 9.45      | 0.89 ± 9.47     | 2.12 ± 21.03  | 2.13 ± 21.13   | 0.09 ± 1.34      | -0.28 ± 2.29    | -0.28 ± 2.3     | 0.09 ± 1.34     | -0.38 ± 2.54  | -0.38 ± 2.55   | -1.58 ± 9.74 | 0.52 ± 3.94   |
| 65  | Slide (65)                       | -0.15 ± 0.07    | -0.15 ± 0.07   | -0.26 ± 0.18  | 0.05 ± 0.08  | -0.14 ± 0.02     | -0.14 ± 0.02    | 0.43 ± 0.1    | 0.43 ± 0.1     | 0.02 ± 0.02      | -0.06 ± 0.01    | -0.06 ± 0.01    | 0.02 ± 0.02     | 0.01 ± 0.01   | 0.01 ± 0.01    | 0.01 ± 0.01  | 0.05 ± 0.03   |
| 91  | Slide (91)                       | -0.1 ± 0.03     | -0.1 ± 0.03    | -0.16 ± 0.07  | 0.08 ± 0.06  | -0.07 ± 0.01     | -0.07 ± 0.01    | 0.23 ± 0.03   | 0.23 ± 0.03    | 0.03 ± 0.01      | -0.07 ± 0.01    | -0.07 ± 0.01    | 0.03 ± 0.01     | 0.04 ± 0.0    | 0.04 ± 0.0     | -0.01 ± 0.01 | 0.03 ± 0.02   |
| 96  | Slide (96)                       | -0.12 ± 0.04    | -0.12 ± 0.04   | -0.16 ± 0.07  | 0.1 ± 0.07   | -0.08 ± 0.01     | -0.08 ± 0.01    | 0.22 ± 0.03   | 0.23 ± 0.03    | 0.01 ± 0.01      | -0.06 ± 0.01    | -0.06 ± 0.01    | 0.01 ± 0.01     | 0.06 ± 0.01   | 0.06 ± 0.01    | 0.0 ± 0.01   | 0.03 ± 0.02   |
| 28  | Slide (DNA-protein complex) (28) | -0.24 ± 1.15    | -0.24 ± 1.17   | 0.71 ± 4.37   | -0.16 ± 0.48 | 0.44 ± 5.13      | 0.44 ± 5.13     | -0.5 ± 3.4    | -0.5 ± 3.41    | 0.22 ± 1.78      | -0.16 ± 1.76    | -0.16 ± 1.75    | 0.22 ± 1.81     | 0.03 ± 0.48   | 0.03 ± 0.48    | 0.18 ± 4.27  | -0.39 ± 17.42 |
| 86  | Slide (DNA-protein complex) (86) | -0.02 ± 0.01    | -0.02 ± 0.01   | 0.39 ± 0.08   | -0.1 ± 0.04  | 0.28 ± 0.06      | 0.28 ± 0.06     | -0.46 ± 0.08  | -0.46 ± 0.08   | 0.1 ± 0.02       | -0.13 ± 0.03    | -0.13 ± 0.03    | 0.1 ± 0.02      | 0.07 ± 0.03   | 0.07 ± 0.03    | 0.16 ± 0.1   | -0.21 ± 0.22  |
| 101 | Slide (RNA) (101)                | -0.01 ± 0.0     | -0.01 ± 0.0    | -0.01 ± 0.0   | -0.0 ± 0.0   | -0.0 ± 0.0       | -0.0 ± 0.0      | -0.0 ± 0.0    | -0.0 ± 0.0     | 0.0 ± 0.0        | 0.01 ± 0.0      | 0.01 ± 0.0      | 0.0 ± 0.0       | 0.01 ± 0.0    | 0.01 ± 0.0     | -0.0 ± 0.0   | 0.01 ± 0.01   |
| 67  | Slide stiffness (67)             | 0.0 ± 0.0       | 0.0 ± 0.0      | 0.06 ± 0.02   | -0.03 ± 0.01 | 0.02 ± 0.0       | 0.02 ± 0.0      | -0.01 ± 0.0   | -0.01 ± 0.0    | -0.01 ± 0.0      | -0.01 ± 0.0     | -0.01 ± 0.0     | -0.01 ± 0.0     | -0.01 ± 0.0   | -0.01 ± 0.0    | 0.01 ± 0.01  | -0.0 ± 0.0    |
| 50  | Slide_rise (50)                  | -0.01 ± 0.0     | -0.01 ± 0.0    | 0.05 ± 0.02   | -0.03 ± 0.01 | 0.04 ± 0.0       | 0.04 ± 0.0      | -0.03 ± 0.0   | -0.03 ± 0.0    | -0.01 ± 0.0      | -0.02 ± 0.0     | -0.01 ± 0.0     | -0.01 ± 0.0     | -0.01 ± 0.0   | -0.01 ± 0.0    | 0.03 ± 0.02  | -0.0 ± 0.0    |
| 46  | Slide_slide (46)                 | 0.01 ± 0.0      | 0.01 ± 0.0     | 0.02 ± 0.0    | -0.01 ± 0.0  | 0.0 ± 0.0        | 0.0 ± 0.0       | -0.01 ± 0.0   | -0.01 ± 0.0    | -0.0 ± 0.0       | -0.0 ± 0.0      | -0.0 ± 0.0      | -0.0 ± 0.0      | 0.01 ± 0.0    | 0.01 ± 0.0     | -0.0 ± 0.0   | -0.01 ± 0.01  |
| 109 | Stacking energy (109)            | -0.02 ± 0.0     | -0.02 ± 0.0    | -0.01 ± 0.0   | -0.02 ± 0.01 | 0.02 ± 0.0       | 0.02 ± 0.0      | -0.01 ± 0.0   | -0.01 ± 0.0    | -0.01 ± 0.0      | 0.02 ± 0.0      | 0.02 ± 0.0      | -0.01 ± 0.0     | 0.0 ± 0.0     | 0.0 ± 0.0      | 0.04 ± 0.01  | 0.0 ± 0.0     |
| 2   | Stacking energy (2)              | 0.0 ± 0.0       | 0.0 ± 0.0      | -0.01 ± 0.0   | -0.0 ± 0.0   | 0.0 ± 0.0        | 0.0 ± 0.0       | 0.0 ± 0.0     | 0.0 ± 0.0      | -0.0 ± 0.0       | -0.0 ± 0.0      | -0.0 ± 0.0      | -0.0 ± 0.0      | -0.01 ± 0.0   | -0.01 ± 0.0    | 0.01 ± 0.0   | 0.0 ± 0.0     |
| 33  | Stacking energy (33)             | -0.03 ± 0.0     | -0.03 ± 0.0    | -0.01 ± 0.0   | -0.03 ± 0.01 | 0.02 ± 0.0       | 0.02 ± 0.0      | -0.01 ± 0.0   | -0.01 ± 0.0    | -0.01 ± 0.0      | 0.02 ± 0.0      | 0.02 ± 0.0      | -0.01 ± 0.0     | 0.0 ± 0.0     | 0.0 ± 0.0      | 0.04 ± 0.01  | 0.01 ± 0.0    |
| 60  | Stacking energy (60)             | 0.0 ± 0.0       | 0.0 ± 0.0      | -0.0 ± 0.0    | 0.0 ± 0.0    | 0.0 ± 0.0        | 0.0 ± 0.0       | 0.01 ± 0.0    | 0.01 ± 0.0     | -0.0 ± 0.0       | -0.01 ± 0.0     | -0.01 ± 0.0     | -0.0 ± 0.0      | -0.01 ± 0.0   | -0.01 ± 0.0    | -0.01 ± 0.0  | 0.0 ± 0.0     |
| 106 | Stacking energy (RNA) (106)      | -0.0 ± 0.0      | -0.0 ± 0.0     | 0.01 ± 0.0    | 0.01 ± 0.0   | -0.0 ± 0.0       | -0.0 ± 0.0      | 0.0 ± 0.0     | 0.0 ± 0.0      | -0.0 ± 0.0       | -0.0 ± 0.0      | -0.0 ± 0.0      | -0.0 ± 0.0      | -0.01 ± 0.0   | -0.01 ± 0.0    | 0.01 ± 0.0   | 0.0 ± 0.0     |
| 82  | Thymine content (82)             | -0.09 ± 0.03    | 0.23 ± 0.03    | 0.05 ± 0.0    | 0.04 ± 0.01  | -0.05 ± 0.01     | 0.04 ± 0.02     | -0.07 ± 0.01  | 0.05 ± 0.02    | -0.06 ± 0.01     | 0.05 ± 0.02     | -0.06 ± 0.01    | 0.05 ± 0.02     | -0.05 ± 0.02  | -0.05 ± 0.02   | -0.05 ± 0.02 | -0.03 ± 0.03  |
| 117 | Tilt (117)                       | -12.61 ± 560.88 | 12.57 ± 560.53 | -0.06 ± 0.37  | -0.05 ± 0.31 | -26.17 ± 1498.74 | 26.33 ± 1495.69 | 6.11 ± 300.79 | -6.22 ± 299.97 | -24.29 ± 1111.63 | 21.57 ± 1108.01 | -21.3 ± 1106.24 | 24.44 ± 1112.79 | 6.09 ± 324.05 | -6.11 ± 323.29 | -0.04 ± 0.27 | -0.03 ± 0.19  |
| 62  | Tilt (62)                        | -0.0 ± 17.77    | -0.01 ± 17.27  | 0.04 ± 32.9   | 0.06 ± 85.56 | -0.23 ± 27.46    | -0.23 ± 27.5    | -0.01 ± 5.09  | -0.01 ± 5.12   | 0.31 ± 35.09     | 0.02 ± 6.02     | 0.02 ± 6.23     | 0.28 ± 33.96    | 0.35 ± 27.11  | 0.37 ± 27.89   | 0.04 ± 5.88  | 0.05 ± 5.37   |
| 89  | Tilt (89)                        | -0.03 ± 0.0     | -0.03 ± 0.0    | -0.08 ± 0.03  | -0.06 ± 0.03 | 0.03 ± 0.01      | 0.03 ± 0.01     | -0.14 ± 0.01  | -0.14 ± 0.01   | 0.22 ± 0.01      | -0.02 ± 0.01    | -0.02 ± 0.01    | 0.22 ± 0.01     | 0.05 ± 0.01   | 0.05 ± 0.01    | -0.05 ± 0.03 | -0.04 ± 0.03  |
| 93  | Tilt (93)                        | -0.02 ± 0.01    | -0.02 ± 0.01   | -0.07 ± 0.03  | -0.06 ± 0.03 | -0.04 ± 0.01     | -0.04 ± 0.01    | -0.13 ± 0.01  | -0.13 ± 0.01   | 0.18 ± 0.02      | 0.02 ± 0.01     | 0.02 ± 0.01     | 0.18 ± 0.02     | 0.13 ± 0.02   | 0.13 ± 0.02    | -0.05 ± 0.03 | -0.04 ± 0.04  |
| 27  | Tilt (DNA-protein complex) (27)  | 0.11 ± 0.02     | 0.11 ± 0.02    | -0.07 ± 0.02  | -0.06 ± 0.02 | -0.03 ± 0.0      | -0.06 ± 0.01    | -0.04 ± 0.0   | -0.04 ± 0.0    | 0.03 ± 0.01      | 0.06 ± 0.01     | 0.06 ± 0.01     | 0.03 ± 0.01     | 0.01 ± 0.01   | 0.01 ± 0.01    | -0.05 ± 0.02 | -0.03 ± 0.03  |



|     |                                  |             |             |              |              |              |              |              |              |               |              |              |               |               |               |              |              |
|-----|----------------------------------|-------------|-------------|--------------|--------------|--------------|--------------|--------------|--------------|---------------|--------------|--------------|---------------|---------------|---------------|--------------|--------------|
| 83  | Tilt (DNA-protein complex) (83)  | 0.12 ± 0.02 | 0.12 ± 0.02 | -0.07 ± 0.03 | -0.06 ± 0.03 | -0.04 ± 0.01 | -0.04 ± 0.01 | -0.12 ± 0.02 | -0.12 ± 0.02 | 0.12 ± 0.02   | 0.1 ± 0.02   | 0.1 ± 0.02   | 0.12 ± 0.02   | -0.04 ± 0.01  | -0.04 ± 0.01  | -0.05 ± 0.02 | -0.03 ± 0.03 |
| 103 | Tilt (RNA) (103)                 | -0.3 ± 0.14 | -0.3 ± 0.14 | 0.16 ± 0.12  | -0.1 ± 0.05  | 0.06 ± 0.01  | 0.06 ± 0.01  | 0.11 ± 0.02  | 0.11 ± 0.02  | 0.02 ± 0.01   | 0.14 ± 0.03  | 0.14 ± 0.03  | 0.02 ± 0.01   | -0.01 ± 0.01  | -0.01 ± 0.01  | -0.05 ± 0.02 | -0.04 ± 0.04 |
| 70  | Tilt stiffness (70)              | 0.01 ± 0.0  | 0.01 ± 0.0  | 0.0 ± 0.0    | -0.03 ± 0.01 | 0.01 ± 0.0   | 0.01 ± 0.0   | -0.02 ± 0.0  | -0.02 ± 0.0  | 0.0 ± 0.0     | 0.01 ± 0.0   | 0.01 ± 0.0   | 0.0 ± 0.0     | 0.01 ± 0.0    | 0.01 ± 0.0    | 0.0 ± 0.0    | -0.01 ± 0.01 |
| 56  | Tilt_rise (56)                   | 0.29 ± 0.04 | 0.29 ± 0.04 | -0.08 ± 0.03 | -0.05 ± 0.02 | -0.1 ± 0.02  | -0.1 ± 0.02  | -0.04 ± 0.0  | -0.04 ± 0.0  | -0.12 ± 0.02  | 0.05 ± 0.02  | 0.05 ± 0.02  | -0.12 ± 0.02  | 0.04 ± 0.02   | 0.04 ± 0.02   | 0.02 ± 0.02  | -0.04 ± 0.03 |
| 44  | Tilt_roll (44)                   | 0.58 ± 8.37 | 0.56 ± 7.43 | 0.03 ± 1.19  | -0.08 ± 0.24 | 0.45 ± 10.57 | 0.41 ± 8.57  | 0.13 ± 4.28  | 0.12 ± 3.49  | -0.64 ± 12.67 | -0.11 ± 1.31 | -0.11 ± 1.19 | -0.65 ± 12.95 | -0.38 ± 11.04 | -0.36 ± 10.16 | -0.32 ± 7.74 | 0.15 ± 4.74  |
| 54  | Tilt_shift (54)                  | -0.1 ± 0.04 | -0.1 ± 0.04 | -0.19 ± 0.89 | -0.15 ± 0.75 | -0.03 ± 0.05 | -0.03 ± 0.05 | -0.09 ± 0.05 | -0.09 ± 0.05 | 0.03 ± 0.19   | 0.06 ± 0.3   | 0.06 ± 0.3   | 0.03 ± 0.19   | 0.2 ± 0.3     | 0.2 ± 0.29    | 0.12 ± 0.18  | 0.09 ± 0.13  |
| 55  | Tilt_slide (55)                  | 0.15 ± 0.02 | 0.15 ± 0.02 | 0.19 ± 0.03  | -0.17 ± 0.06 | 0.2 ± 0.05   | 0.2 ± 0.05   | -0.01 ± 0.01 | -0.01 ± 0.01 | -0.23 ± 0.06  | -0.01 ± 0.01 | -0.01 ± 0.01 | -0.23 ± 0.06  | -0.14 ± 0.07  | -0.14 ± 0.07  | 0.3 ± 0.21   | -0.17 ± 0.17 |
| 40  | Tilt_tilt (40)                   | 0.01 ± 0.0  | 0.01 ± 0.0  | 0.01 ± 0.0   | -0.02 ± 0.01 | 0.01 ± 0.0   | 0.01 ± 0.0   | -0.02 ± 0.0  | -0.02 ± 0.0  | 0.0 ± 0.0     | 0.0 ± 0.0    | 0.0 ± 0.0    | 0.0 ± 0.0     | 0.01 ± 0.0    | 0.01 ± 0.0    | 0.0 ± 0.0    | -0.01 ± 0.01 |
| 5   | Tip (5)                          | 0.01 ± 0.01 | 0.01 ± 0.01 | 0.02 ± 0.01  | 0.23 ± 0.05  | 0.02 ± 0.01  | 0.02 ± 0.01  | -0.16 ± 0.03 | -0.16 ± 0.03 | -0.03 ± 0.01  | -0.01 ± 0.01 | -0.01 ± 0.01 | -0.03 ± 0.01  | -0.03 ± 0.01  | -0.03 ± 0.01  | 0.04 ± 0.04  | -0.03 ± 0.03 |
| 1   | Twist (1)                        | 0.01 ± 0.0  | 0.01 ± 0.0  | -0.01 ± 0.0  | -0.01 ± 0.0  | -0.01 ± 0.0  | -0.01 ± 0.0  | 0.01 ± 0.0   | 0.01 ± 0.0   | -0.01 ± 0.0   | 0.01 ± 0.0   | 0.01 ± 0.0   | -0.01 ± 0.0   | -0.0 ± 0.0    | -0.0 ± 0.0    | 0.0 ± 0.0    | -0.0 ± 0.0   |
| 118 | Twist (118)                      | 0.0 ± 0.0   | 0.0 ± 0.0   | 0.0 ± 0.0    | -0.0 ± 0.0   | -0.0 ± 0.0   | -0.0 ± 0.0   | -0.0 ± 0.0   | -0.0 ± 0.0   | -0.0 ± 0.0    | 0.0 ± 0.0    | 0.0 ± 0.0    | -0.0 ± 0.0    | -0.0 ± 0.0    | -0.0 ± 0.0    | -0.0 ± 0.0   | -0.0 ± 0.0   |
| 120 | Twist (120)                      | 0.0 ± 0.0   | 0.0 ± 0.0   | 0.0 ± 0.0    | -0.0 ± 0.0   | -0.0 ± 0.0   | -0.0 ± 0.0   | -0.01 ± 0.0  | -0.01 ± 0.0  | -0.0 ± 0.0    | 0.0 ± 0.0    | 0.0 ± 0.0    | -0.0 ± 0.0    | -0.0 ± 0.0    | -0.0 ± 0.0    | 0.0 ± 0.0    | -0.0 ± 0.0   |
| 61  | Twist (61)                       | -0.0 ± 0.0  | -0.0 ± 0.0  | -0.01 ± 0.0  | 0.01 ± 0.0   | -0.01 ± 0.0  | -0.01 ± 0.0  | 0.01 ± 0.0   | 0.01 ± 0.0   | -0.01 ± 0.0   | 0.01 ± 0.0   | 0.01 ± 0.0   | -0.01 ± 0.0   | -0.0 ± 0.0    | -0.0 ± 0.0    | 0.01 ± 0.0   | -0.0 ± 0.0   |
| 88  | Twist (88)                       | 0.0 ± 0.0   | 0.0 ± 0.0   | -0.0 ± 0.0   | 0.01 ± 0.0   | 0.0 ± 0.0    | 0.0 ± 0.0    | 0.0 ± 0.0    | 0.0 ± 0.0    | -0.01 ± 0.0   | 0.01 ± 0.0   | 0.01 ± 0.0   | -0.01 ± 0.0   | -0.0 ± 0.0    | -0.0 ± 0.0    | 0.0 ± 0.0    | -0.0 ± 0.0   |
| 92  | Twist (92)                       | -0.0 ± 0.0  | -0.0 ± 0.0  | -0.01 ± 0.0  | 0.01 ± 0.0   | -0.0 ± 0.0   | -0.0 ± 0.0   | 0.01 ± 0.0   | 0.01 ± 0.0   | -0.01 ± 0.0   | 0.01 ± 0.0   | 0.01 ± 0.0   | -0.01 ± 0.0   | -0.0 ± 0.0    | -0.0 ± 0.0    | 0.0 ± 0.0    | 0.0 ± 0.0    |
| 98  | Twist (98)                       | 0.0 ± 0.0   | 0.0 ± 0.0   | -0.01 ± 0.0  | 0.0 ± 0.0    | 0.0 ± 0.0    | 0.0 ± 0.0    | 0.0 ± 0.0    | 0.0 ± 0.0    | -0.01 ± 0.0   | 0.01 ± 0.0   | 0.01 ± 0.0   | -0.01 ± 0.0   | -0.0 ± 0.0    | -0.0 ± 0.0    | 0.01 ± 0.0   | -0.0 ± 0.0   |
| 26  | Twist (DNA-protein complex) (26) | 0.0 ± 0.0   | 0.0 ± 0.0   | -0.01 ± 0.0  | 0.01 ± 0.0   | -0.0 ± 0.0   | -0.0 ± 0.0   | 0.0 ± 0.0    | 0.0 ± 0.0    | -0.0 ± 0.0    | 0.0 ± 0.0    | 0.0 ± 0.0    | -0.0 ± 0.0    | -0.0 ± 0.0    | -0.0 ± 0.0    | 0.0 ± 0.0    | 0.0 ± 0.0    |
| 37  | Twist (DNA-protein complex) (37) | 0.0 ± 0.0   | 0.0 ± 0.0   | -0.01 ± 0.0  | 0.01 ± 0.0   | -0.0 ± 0.0   | -0.0 ± 0.0   | 0.01 ± 0.0   | 0.01 ± 0.0   | -0.0 ± 0.0    | 0.0 ± 0.0    | 0.0 ± 0.0    | -0.0 ± 0.0    | -0.0 ± 0.0    | -0.0 ± 0.0    | -0.0 ± 0.0   | 0.0 ± 0.0    |
| 105 | Twist (RNA) (105)                | -0.0 ± 0.0  | -0.0 ± 0.0  | 0.0 ± 0.0    | 0.0 ± 0.0    | 0.0 ± 0.0    | 0.0 ± 0.0    | -0.0 ± 0.0   | -0.0 ± 0.0   | -0.0 ± 0.0    | 0.0 ± 0.0    | 0.0 ± 0.0    | -0.0 ± 0.0    | 0.0 ± 0.0     | 0.0 ± 0.0     | 0.01 ± 0.0   | -0.0 ± 0.0   |
| 71  | Twist stiffness (71)             | 0.0 ± 0.0   | 0.0 ± 0.0   | 0.02 ± 0.01  | -0.02 ± 0.01 | 0.02 ± 0.0   | 0.02 ± 0.0   | -0.03 ± 0.0  | -0.03 ± 0.0  | 0.01 ± 0.0    | -0.0 ± 0.0   | -0.0 ± 0.0   | 0.01 ± 0.0    | 0.0 ± 0.0     | 0.0 ± 0.0     | -0.0 ± 0.0   | -0.02 ± 0.01 |
| 53  | Twist_rise (53)                  | 0.02 ± 0.01 | 0.02 ± 0.01 | -0.03 ± 0.01 | -0.02 ± 0.01 | 0.01 ± 0.0   | 0.01 ± 0.0   | -0.0 ± 0.0   | -0.0 ± 0.0   | 0.01 ± 0.0    | -0.0 ± 0.0   | -0.0 ± 0.0   | 0.01 ± 0.0    | -0.01 ± 0.0   | -0.01 ± 0.0   | 0.01 ± 0.0   | -0.0 ± 0.0   |
| 43  | Twist_roll (43)                  | 0.02 ± 0.0  | 0.02 ± 0.0  | 0.01 ± 0.0   | 0.01 ± 0.0   | 0.01 ± 0.0   | 0.01 ± 0.0   | -0.02 ± 0.0  | -0.02 ± 0.0  | -0.01 ± 0.0   | 0.02 ± 0.0   | 0.02 ± 0.0   | -0.01 ± 0.0   | -0.02 ± 0.0   | -0.02 ± 0.0   | 0.0 ± 0.0    | -0.02 ± 0.02 |
| 51  | Twist_shift (51)                 | 0.59 ± 0.09 | 0.59 ± 0.09 | -0.15 ± 0.04 | -0.1 ± 0.04  | -0.01 ± 0.0  | -0.01 ± 0.0  | -0.16 ± 0.04 | -0.16 ± 0.04 | -0.32 ± 0.1   | -0.07 ± 0.01 | -0.07 ± 0.01 | -0.33 ± 0.1   | 0.12 ± 0.07   | 0.12 ± 0.07   | -0.06 ± 0.03 | 0.08 ± 0.09  |
| 52  | Twist_slide (52)                 | 0.03 ± 0.01 | 0.03 ± 0.01 | -0.02 ± 0.01 | -0.03 ± 0.01 | 0.01 ± 0.0   | 0.01 ± 0.0   | -0.06 ± 0.01 | -0.06 ± 0.01 | 0.01 ± 0.0    | 0.02 ± 0.0   | 0.02 ± 0.0   | 0.01 ± 0.0    | 0.02 ± 0.01   | 0.02 ± 0.01   | 0.01 ± 0.0   | -0.02 ± 0.01 |
| 42  | Twist_tilt (42)                  | 0.65 ± 0.12 | 0.65 ± 0.12 | -0.1 ± 0.03  | -0.12 ± 0.04 | 0.01 ± 0.03  | 0.01 ± 0.03  | -0.11 ± 0.04 | -0.11 ± 0.04 | -0.31 ± 0.15  | -0.01 ± 0.02 | -0.01 ± 0.02 | -0.31 ± 0.16  | -0.08 ± 0.05  | -0.08 ± 0.05  | -0.03 ± 0.01 | 0.06 ± 0.11  |
| 39  | Twist_twist (39)                 | 0.01 ± 0.0  | 0.01 ± 0.0  | 0.01 ± 0.0   | -0.01 ± 0.0  | 0.01 ± 0.0   | 0.01 ± 0.0   | -0.03 ± 0.0  | -0.03 ± 0.0  | 0.01 ± 0.0    | 0.0 ± 0.0    | 0.0 ± 0.0    | 0.01 ± 0.0    | 0.01 ± 0.0    | 0.01 ± 0.0    | 0.0 ± 0.0    | -0.02 ± 0.01 |
| 99  | Wedge (99)                       | 0.06 ± 0.02 | 0.06 ± 0.02 | -0.03 ± 0.01 | -0.05 ± 0.02 | -0.04 ± 0.0  | -0.04 ± 0.0  | -0.01 ± 0.0  | -0.01 ± 0.0  | 0.05 ± 0.01   | 0.01 ± 0.0   | 0.01 ± 0.0   | 0.05 ± 0.01   | -0.03 ± 0.01  | -0.03 ± 0.01  | 0.01 ± 0.0   | 0.02 ± 0.02  |

**Table S5: Significance levels of DNA property changes induced by dinucleotide contents**

| property id | property name         | AA    | TT    | AT    | TA    | AC    | GT    | CA    | TG    | AG    | TC    | GA    | CT    | CC    | GG    | GC    | CG    |
|-------------|-----------------------|-------|-------|-------|-------|-------|-------|-------|-------|-------|-------|-------|-------|-------|-------|-------|-------|
| 79          | Adenine content (79)  | 8.95  | -3.54 | 11.95 | 6.78  | 2.19  | -9.48 | 2.42  | -8.79 | 2.42  | -8.85 | 2.16  | -7.08 | -3.15 | -3.17 | -2.16 | -1.15 |
| 4           | Bend (4)              | -0.65 | -0.65 | -2.01 | 3.06  | -1.38 | -1.38 | 3.02  | 3.01  | -6.69 | -7.55 | -7.4  | -6.78 | -4.1  | -4.12 | -0.08 | -2.01 |
| 21          | Clash Strength (21)   | -4.97 | -5.02 | 2.03  | -2.54 | -1.58 | -1.58 | -4.03 | -4.02 | 7.53  | -8.53 | -8.48 | 7.64  | 5.33  | 5.35  | -2.03 | 1.34  |
| 81          | Cytosine content (81) | -3.52 | -3.54 | -3.09 | -2.54 | 3.45  | -9.48 | 3.35  | -8.79 | -7.07 | 3.57  | -8.77 | 3.79  | 7.12  | -3.17 | 8.67  | 1.91  |

|     |                                            |       |              |       |              |       |       |       |       |       |       |       |       |              |       |       |       |
|-----|--------------------------------------------|-------|--------------|-------|--------------|-------|-------|-------|-------|-------|-------|-------|-------|--------------|-------|-------|-------|
| 100 | Direction (100)                            | -0.53 | 0.53         | -2.8  | $\bar{2.37}$ | 1.02  | -1.16 | -1.32 | 1.06  | -2.68 | -1.32 | 1.09  | -4.89 | $\bar{2.53}$ | 1.89  | 3.81  | -1.23 |
| 123 | Enthalpy (123)                             | -7.39 | -7.5         | -5.21 | $\bar{3.64}$ | 2.05  | 2.05  | 2.79  | 2.8   | -2.19 | 0.55  | 0.55  | -2.17 | $\bar{0.77}$ | -0.78 | 3.01  | 1.3   |
| 22  | Enthalpy (22)                              | -1.29 | $\bar{1.29}$ | -4.03 | $\bar{3.68}$ | 3.2   | 3.2   | -0.59 | -0.59 | -4.48 | 1.33  | 1.33  | -4.44 | 5.17         | 5.18  | 4.3   | 1.44  |
| 110 | Enthalpy (RNA) (110)                       | -5.5  | $\bar{5.57}$ | -4.12 | $\bar{3.11}$ | 2.72  | 2.72  | 3.34  | -3.52 | -3.35 | 2.81  | 8.5   | -3.32 | 5.64         | 5.66  | 3.18  | -0.8  |
| 114 | Enthalpy (RNA) (114)                       | -4.75 | -4.8         | -2.93 | $\bar{3.62}$ | 2.21  | 2.21  | 0.15  | 0.15  | 0.23  | 4.57  | 4.53  | 0.22  | 5.93         | 5.94  | 3.47  | -0.04 |
| 124 | Entropy (124)                              | -7.1  | -7.2         | -4.32 | $\bar{4.61}$ | 3.61  | 3.61  | 5.18  | 5.2   | -4.16 | 2.17  | 2.17  | -4.12 | $\bar{2.61}$ | -2.62 | 2.67  | 1.22  |
| 23  | Entropy (23)                               | 0.05  | 0.05         | -3.9  | $\bar{3.83}$ | 4.9   | 4.89  | -1.61 | -1.61 | -5.29 | 2.11  | 2.11  | -5.25 | 4.86         | 4.87  | 4.39  | 1.44  |
| 111 | Entropy (RNA) (111)                        | -5.58 | $\bar{5.65}$ | -3.96 | $\bar{0.76}$ | 3.26  | 3.26  | 4.75  | -4.67 | -4.26 | 3.4   | 10.21 | -4.23 | 5.51         | 5.53  | 2.98  | -0.94 |
| 115 | Entropy (RNA) (115)                        | -4.7  | $\bar{4.75}$ | -0.01 | $\bar{3.44}$ | 2.62  | 2.62  | -0.17 | -0.17 | 0.03  | 6.01  | 5.93  | 0.03  | 5.98         | 5.98  | 3.27  | -0.45 |
| 122 | Flexibility_shift (122)                    | -3.19 | $\bar{3.21}$ | -3.16 | $\bar{3.37}$ | 11.08 | 11.02 | -4.97 | -4.97 | 7.15  | -2.17 | -2.18 | 7.25  | $\bar{1.42}$ | -1.43 | -2.12 | 1.3   |
| 121 | Flexibility_slide (121)                    | 6.58  | 6.68         | 7.87  | $\bar{1.45}$ | 1.81  | 1.81  | -8.41 | -8.43 | -1.75 | 2.42  | 2.44  | -1.74 | $\bar{2.48}$ | -2.49 | -2.6  | -1.26 |
| 125 | Free energy (125)                          | -6.78 | $\bar{6.87}$ | -5.43 | $\bar{2.94}$ | 1.22  | 1.22  | 1.38  | 1.38  | -0.51 | -0.26 | -0.26 | -0.51 | 5.94         | 5.92  | 3.94  | 1.56  |
| 34  | Free energy (34)                           | -5.34 | -5.4         | -4.5  | $\bar{3.67}$ | 1.88  | 1.88  | 0.96  | 0.96  | 0.74  | 0.09  | 0.09  | 0.74  | 5.97         | 5.95  | 4.3   | 1.58  |
| 35  | Free energy (35)                           | 0.27  | 0.27         | -6.26 | $\bar{2.94}$ | -4.48 | -4.47 | 1.16  | 1.15  | -2.85 | -2.15 | -2.17 | -2.82 | 5.31         | 5.31  | 3.98  | 1.47  |
| 36  | Free energy (36)                           | -6.31 | -6.4         | -4.96 | $\bar{3.54}$ | 1.48  | 1.48  | 1.78  | 1.78  | -1.02 | -0.94 | 0.22  | -1.02 | 5.85         | 5.84  | 3.91  | 1.52  |
| 38  | Free energy (38)                           | -5.36 | $\bar{5.42}$ | -3.79 | $\bar{2.85}$ | 1.57  | 1.57  | 1.52  | 1.52  | 0.06  | 1.1   | 1.1   | 0.06  | 5.31         | 5.29  | 4.92  | 1.65  |
| 72  | Free energy (72)                           | -6.81 | -6.9         | -4.43 | $\bar{3.29}$ | -0.3  | -0.3  | 1.67  | 1.67  | -0.32 | -0.3  | -0.3  | -0.32 | 5.82         | 5.81  | 4.52  | 1.48  |
| 73  | Free energy (73)                           | -6.78 | $\bar{6.87}$ | -5.43 | $\bar{2.94}$ | 1.22  | 1.22  | 1.38  | 1.38  | -0.51 | -0.26 | -0.26 | -0.51 | 5.94         | 5.92  | 3.94  | 1.56  |
| 74  | Free energy (74)                           | -6.42 | $\bar{6.51}$ | -4.79 | $\bar{3.46}$ | 0.59  | 0.59  | 3.46  | 3.47  | -2.74 | 0.94  | 0.95  | -2.71 | 5.73         | 5.71  | 3.62  | 1.56  |
| 75  | Free energy (75)                           | -6.4  | -6.5         | -5.1  | $\bar{3.13}$ | -0.24 | -0.24 | 2.97  | 2.97  | 0.13  | 0.34  | 0.35  | 0.12  | 6.03         | 6.03  | 4.63  | 1.62  |
| 112 | Free energy (RNA) (112)                    | -4.87 | $\bar{4.92}$ | -4.4  | -3.8         | 2.02  | 2.02  | 0.24  | -0.46 | -0.5  | 2.05  | 3.16  | -0.5  | 6.35         | 6.35  | 3.92  | 0.78  |
| 113 | Free energy (RNA) (113)                    | -4.59 | $\bar{4.63}$ | -4.71 | $\bar{4.04}$ | 1.47  | 1.47  | 0.79  | 0.79  | 0.62  | 2.09  | 2.09  | 0.61  | 6.33         | 6.33  | 4.3   | 1.65  |
| 76  | GC content (76)                            | -3.52 | $\bar{3.54}$ | -3.09 | $\bar{2.54}$ | 0.88  | 0.88  | 0.91  | 0.91  | 0.97  | 0.88  | 0.88  | 0.97  | 6.8          | 6.77  | 8.68  | 1.91  |
| 80  | Guanine content (80)                       | -3.52 | $\bar{3.54}$ | -3.09 | $\bar{2.54}$ | -9.54 | 3.46  | -8.78 | 3.37  | 3.79  | -8.85 | 3.57  | -7.08 | $\bar{3.15}$ | 7.11  | 8.52  | 1.91  |
| 29  | Hydrophilicity (RNA) (29)                  | -3.57 | 3.23         | -3.27 | $\bar{2.74}$ | -8.27 | -2.79 | -7.62 | 8.77  | -7.22 | 10.55 | -8.46 | 7.86  | 3.52         | -3.07 | -1.66 | 1.44  |
| 31  | Hydrophilicity (RNA) (31)                  | -3.6  | 2.77         | -3.57 | $\bar{3.92}$ | -7.38 | 1.36  | -4.55 | 6.59  | -6.88 | 11.39 | -7.79 | 7.79  | 4.02         | -2.62 | -0.08 | 1.43  |
| 6   | Inclination (6)                            | -0.0  | 0.0          | -0.11 | $\bar{0.11}$ | -0.01 | 0.01  | 0.01  | -0.01 | -0.01 | 0.01  | -0.01 | 0.01  | $\bar{0.01}$ | 0.01  | -0.07 | -0.06 |
| 78  | Keto (GT) content (78)                     | -3.56 | 3.74         | 3.9   | 3.06         | -9.59 | 9.0   | -8.04 | 6.11  | -6.6  | 6.54  | 6.43  | 5.23  | $\bar{3.12}$ | 3.08  | 2.1   | 1.15  |
| 8   | Major Groove Depth (8)                     | 6.11  | 6.16         | -0.35 | 3.12         | 5.18  | 5.17  | -5.83 | -5.85 | -0.04 | -4.86 | -4.82 | -0.04 | -4.2         | -4.22 | -3.9  | -1.96 |
| 10  | Major Groove Distance (10)                 | -2.48 | $\bar{2.49}$ | -3.09 | 2.55         | -9.55 | -9.49 | 8.74  | 8.75  | -5.89 | 1.45  | 1.44  | -5.9  | $\bar{2.77}$ | -2.78 | -2.16 | 1.14  |
| 9   | Major Groove Size (9)                      | 0.1   | 0.1          | 3.09  | $\bar{2.54}$ | 0.1   | 0.1   | 0.1   | 0.1   | 7.08  | -8.83 | -8.75 | 7.09  | 0.1          | 0.1   | -2.15 | 1.15  |
| 7   | Major Groove Width (7)                     | -6.48 | $\bar{6.58}$ | -3.83 | $\bar{4.26}$ | -3.62 | -3.62 | 1.19  | 1.19  | 0.86  | 2.99  | 2.99  | 0.85  | 4.6          | 4.61  | 4.43  | 1.69  |
| 108 | Melting Temperature (108)                  | -7.46 | $\bar{7.58}$ | -7.7  | $\bar{3.29}$ | 7.52  | 7.5   | -3.68 | -3.67 | -2.86 | 4.85  | 4.81  | -2.84 | 5.65         | 5.63  | 2.64  | -0.06 |
| 16  | Melting Temperature (16)                   | -6.54 | $\bar{6.63}$ | -6.95 | $\bar{2.95}$ | 6.24  | 6.23  | -4.22 | -4.22 | -3.18 | 4.28  | 4.25  | -3.15 | 5.57         | 5.55  | 3.04  | -0.03 |
| 12  | Minor Groove Depth (12)                    | 2.3   | 2.31         | -2.97 | 0.6          | -8.55 | -8.51 | 6.86  | 6.87  | -1.55 | 7.58  | 7.51  | -1.56 | $\bar{0.55}$ | -0.55 | -1.35 | 1.18  |
| 14  | Minor Groove Distance (14)                 | -3.51 | $\bar{3.54}$ | 3.1   | $\bar{2.55}$ | 9.97  | 9.91  | -8.47 | -8.49 | -6.83 | -8.88 | -8.79 | -6.85 | $\bar{3.14}$ | -3.15 | 2.19  | -1.15 |
| 13  | Minor Groove Size (13)                     | -6.57 | $\bar{6.67}$ | -2.26 | $\bar{3.24}$ | -1.69 | -1.69 | 3.5   | 3.51  | 5.81  | -3.91 | -3.93 | 5.89  | 5.42         | 5.43  | -0.99 | 1.32  |
| 11  | Minor Groove Width (11)                    | 0.84  | 0.84         | 0.96  | 3.02         | 5.79  | 5.78  | -6.61 | -6.64 | -0.73 | -9.53 | -9.27 | -0.72 | $\bar{4.26}$ | -4.28 | -3.26 | -0.36 |
| 18  | Mobility to bend towards major groove (18) | 4.85  | 5.57         | 6.26  | 0.67         | 0.03  | -4.66 | 0.01  | -3.32 | 0.03  | -3.54 | 1.72  | -2.28 | $\bar{4.83}$ | -5.17 | -3.14 | -1.78 |
| 19  | Mobility to bend towards minor groove (19) | -6.74 | $\bar{6.84}$ | -5.37 | $\bar{4.36}$ | -1.52 | -0.99 | 2.08  | 5.75  | -2.14 | 4.94  | -0.44 | 2.17  | 4.85         | 5.15  | 4.19  | 1.48  |
| 15  | Persistence Length (15)                    | -6.43 | $\bar{6.52}$ | -3.9  | $\bar{3.01}$ | 0.32  | 0.32  | 0.36  | 0.36  | 0.34  | 0.31  | 0.31  | 0.34  | 6.24         | 6.26  | 7.68  | 1.98  |

|     |                                             |       |       |       |       |        |        |       |       |       |        |        |       |       |       |       |       |
|-----|---------------------------------------------|-------|-------|-------|-------|--------|--------|-------|-------|-------|--------|--------|-------|-------|-------|-------|-------|
| 17  | Probability contacting nucleosome core (17) | 4.94  | 5.0   | -2.62 | -2.3  | -3.53  | -3.52  | 4.95  | 4.93  | 3.89  | -0.54  | -0.54  | 3.83  | -4.09 | -4.08 | -2.29 | -1.11 |
| 20  | Propeller Twist (20)                        | 5.17  | 5.23  | 4.78  | -1.77 | -10.04 | -9.97  | -9.03 | -9.07 | 3.14  | 3.81   | 3.83   | 3.12  | 0.16  | 0.16  | -6.56 | -1.54 |
| 77  | Purine (AG) content (77)                    | 3.53  | -3.54 | 0.05  | 0.05  | 0.07   | 0.07   | 0.07  | 0.07  | 7.11  | -8.85  | 8.86   | -7.08 | -3.15 | 3.17  | 0.06  | 0.06  |
| 3   | Rise (3)                                    | -5.18 | -5.24 | 2.35  | -3.53 | -1.84  | -1.83  | -4.94 | -4.93 | 3.32  | -0.61  | -0.62  | 3.33  | 4.15  | 4.17  | 3.62  | 1.71  |
| 66  | Rise (66)                                   | -5.49 | -5.55 | -5.51 | 1.87  | -6.19  | -6.17  | -0.99 | -0.99 | -4.61 | 9.9    | 9.64   | -4.57 | 4.44  | 4.45  | 2.39  | -0.99 |
| 97  | Rise (97)                                   | -5.68 | -5.75 | -5.05 | 2.01  | -3.86  | -3.85  | 5.86  | 5.87  | -3.93 | -3.67  | -3.69  | -3.89 | 4.76  | 4.77  | 2.54  | 1.49  |
| 32  | Rise (DNA-protein complex) (32)             | -4.76 | -4.81 | -4.28 | 1.48  | 3.54   | 3.54   | 3.42  | 3.43  | 3.61  | 3.65   | 3.63   | 3.63  | 4.88  | 4.87  | 5.62  | 1.85  |
| 87  | Rise (DNA-protein complex) (87)             | -4.68 | -4.73 | -5.39 | 2.06  | 1.22   | 1.22   | -2.27 | -2.27 | -1.23 | 2.62   | 2.61   | -1.23 | 4.45  | 4.47  | 3.67  | 1.62  |
| 102 | Rise (RNA) (102)                            | -4.71 | -4.75 | -0.74 | 1.22  | -0.93  | -0.93  | -7.59 | -7.59 | 6.2   | 10.54  | 10.29  | 6.28  | 4.19  | 4.21  | -1.35 | 1.42  |
| 107 | Rise stiffness (107)                        | -6.72 | -6.8  | 2.91  | -2.62 | 10.47  | 10.39  | -8.39 | -8.39 | -6.45 | 10.34  | 10.14  | -6.43 | 4.21  | 4.23  | 2.26  | -1.12 |
| 47  | Rise_rise (47)                              | -0.87 | -0.87 | 3.2   | -2.51 | 8.85   | 8.8    | -8.98 | -9.0  | -7.19 | 6.98   | 6.98   | -7.22 | -4.12 | -4.13 | 2.07  | -1.15 |
| 116 | Roll (116)                                  | 0.02  | 0.02  | 0.02  | -0.02 | 0.01   | 0.01   | -0.01 | -0.01 | -0.01 | -0.01  | -0.01  | -0.01 | -0.01 | -0.01 | 0.01  | -0.02 |
| 119 | Roll (119)                                  | 1.09  | 1.1   | -2.62 | 2.08  | -11.5  | -11.42 | 9.04  | 9.1   | -6.59 | 12.38  | 11.94  | -6.6  | -2.51 | -2.52 | -2.26 | 1.29  |
| 63  | Roll (63)                                   | 0.97  | 0.97  | -2.32 | -2.12 | 1.6    | 1.6    | -7.75 | -7.77 | 7.43  | -5.87  | -5.92  | 7.52  | 5.52  | 5.59  | -2.49 | 1.37  |
| 90  | Roll (90)                                   | -4.99 | -5.04 | -2.89 | 1.58  | -5.39  | -5.37  | -1.56 | -1.55 | 5.03  | -7.17  | -7.19  | 5.08  | 5.58  | 5.63  | -2.51 | 1.38  |
| 94  | Roll (94)                                   | -4.15 | -4.19 | -2.73 | 1.74  | -3.72  | -3.72  | -4.83 | -4.8  | 10.0  | -5.8   | -5.8   | 10.13 | 4.84  | 4.89  | -2.03 | 1.2   |
| 25  | Roll (DNA-protein complex) (25)             | -3.86 | -3.89 | -3.03 | 0.57  | -9.39  | -9.33  | 8.9   | 8.96  | 8.58  | -0.99  | -0.99  | 8.74  | 7.72  | 7.69  | -2.28 | 1.3   |
| 84  | Roll (DNA-protein complex) (84)             | -3.77 | -3.8  | -3.72 | 1.47  | -8.18  | -8.13  | 7.49  | 7.53  | 7.23  | -3.47  | -3.48  | 7.35  | 6.46  | 6.47  | -2.1  | 1.34  |
| 104 | Roll (RNA) (104)                            | -4.62 | -4.66 | -4.18 | 2.21  | -8.38  | -8.33  | 7.3   | 7.34  | 0.83  | 7.63   | 7.5    | 0.83  | 2.45  | 3.77  | -1.92 | 1.25  |
| 69  | Roll stiffness (69)                         | 2.38  | 2.38  | 2.91  | -2.59 | 10.24  | 10.17  | -8.46 | -8.47 | -5.9  | 6.86   | 6.74   | -5.87 | -2.67 | -2.69 | 2.22  | -1.13 |
| 59  | Roll_rise (59)                              | 0.05  | 0.05  | -0.05 | 0.05  | -0.04  | -0.04  | 0.04  | 0.04  | 0.02  | 0.04   | 0.04   | 0.02  | -0.06 | -0.06 | -0.04 | 0.03  |
| 41  | Roll_roll (41)                              | 3.03  | 3.04  | 2.95  | -2.56 | 10.08  | 10.01  | -8.6  | -8.6  | 5.99  | -6.34  | -6.35  | 6.07  | 3.57  | 3.58  | 2.23  | -1.12 |
| 57  | Roll_shift (57)                             | 4.85  | 4.89  | 5.29  | -3.27 | 2.81   | 2.82   | -3.38 | -3.4  | -2.76 | 2.65   | 2.67   | -2.75 | -1.65 | -1.65 | -1.85 | 0.89  |
| 58  | Roll_slide (58)                             | 8.24  | 8.3   | 6.98  | -1.73 | -9.2   | -9.15  | -6.08 | -6.07 | 3.19  | -9.84  | -9.8   | 3.15  | -5.22 | -5.22 | -1.89 | 0.78  |
| 64  | Shift (64)                                  | 0.12  | 0.12  | -0.12 | 0.12  | -0.11  | -0.11  | -0.11 | -0.11 | -0.11 | -0.14  | -0.14  | -0.11 | -0.11 | -0.11 | 0.11  | -0.11 |
| 95  | Shift (95)                                  | -0.15 | -0.15 | -0.15 | -0.13 | -0.16  | -0.16  | -0.18 | -0.18 | 0.21  | -0.24  | -0.24  | 0.21  | -0.24 | -0.24 | -0.25 | -0.22 |
| 30  | Shift (DNA-protein complex) (30)            | 1.14  | 1.13  | -1.88 | -1.76 | -0.51  | -0.51  | -1.03 | -1.02 | -0.57 | 0.66   | 0.66   | -0.57 | -0.62 | -0.62 | -0.46 | -0.39 |
| 85  | Shift (DNA-protein complex) (85)            | 0.03  | 0.03  | 0.02  | 0.02  | -0.03  | -0.03  | -0.03 | -0.03 | -0.03 | 0.03   | 0.03   | -0.03 | -0.03 | -0.03 | 0.02  | 0.03  |
| 24  | Shift (RNA) (24)                            | -0.66 | -0.66 | -0.66 | -1.02 | 0.9    | 0.9    | 0.68  | 0.68  | -1.95 | 0.48   | 0.48   | -1.96 | -2.43 | -2.43 | 0.9   | 1.49  |
| 68  | Shift stiffness (68)                        | 3.52  | 3.54  | -3.09 | -2.52 | 9.15   | 9.1    | -8.85 | -8.85 | 7.34  | 8.83   | 8.75   | 7.34  | 3.18  | 3.2   | -2.1  | -1.13 |
| 49  | Shift_rise (49)                             | 3.81  | 3.84  | -3.14 | -2.54 | -5.08  | -5.06  | -6.63 | -6.61 | -6.18 | -3.55  | -3.58  | -6.11 | 3.47  | 3.49  | 2.22  | -1.03 |
| 45  | Shift_shift (45)                            | 3.47  | 3.49  | -3.1  | -2.52 | -8.35  | -8.3   | -1.5  | -1.49 | 4.79  | -7.32  | -7.32  | 4.84  | 3.36  | 3.38  | 2.47  | -1.08 |
| 48  | Shift_slide (48)                            | -0.08 | -0.08 | 0.07  | -0.08 | 0.09   | 0.09   | 0.1   | 0.1   | 0.07  | -0.12  | -0.12  | 0.07  | -0.15 | -0.15 | -0.16 | 0.13  |
| 65  | Slide (65)                                  | -2.27 | -2.28 | -1.47 | 0.62  | -6.94  | -6.93  | 4.15  | 4.17  | 1.5   | -5.98  | -5.93  | 1.5   | 0.67  | 0.67  | 1.28  | 1.55  |
| 91  | Slide (91)                                  | -3.3  | -3.33 | -2.41 | 1.47  | -9.26  | -9.2   | 8.11  | 8.15  | 3.1   | -6.91  | -6.84  | 3.12  | 8.47  | 8.41  | -0.83 | 1.53  |
| 96  | Slide (96)                                  | -3.11 | -3.12 | -2.37 | 1.45  | -9.6   | -9.53  | 6.97  | 7.01  | 0.72  | -6.36  | -6.32  | 0.72  | 8.39  | 8.34  | 0.27  | 1.63  |
| 28  | Slide (DNA-protein complex) (28)            | -0.21 | -0.2  | 0.16  | -0.33 | 0.09   | 0.09   | -0.15 | -0.15 | 0.13  | -0.09  | -0.09  | 0.12  | 0.06  | 0.06  | 0.04  | -0.02 |
| 86  | Slide (DNA-protein complex) (86)            | -1.94 | -1.94 | 4.77  | -2.89 | 4.43   | 4.42   | -5.97 | -5.95 | 4.32  | -4.99  | -5.0   | 4.26  | 2.14  | 2.15  | 1.52  | -0.94 |
| 101 | Slide (RNA) (101)                           | -5.34 | -5.4  | -7.23 | -1.53 | -1.98  | -1.98  | -1.21 | -1.21 | 0.08  | 7.14   | 7.02   | 0.08  | 4.8   | 4.82  | -1.31 | 1.35  |
| 67  | Slide stiffness (67)                        | 1.42  | 1.42  | 3.48  | -2.45 | 7.23   | 7.2    | -8.39 | -8.43 | -5.42 | -9.88  | -9.6   | -5.48 | -3.6  | -3.61 | 1.72  | -1.5  |
| 50  | Slide_rise (50)                             | -3.68 | -3.71 | 3.08  | -2.57 | 10.43  | 10.36  | -8.28 | -8.3  | -6.58 | -8.77  | -8.69  | -6.58 | -3.03 | -3.04 | 2.27  | -1.02 |
| 46  | Slide_slide (46)                            | 4.27  | 4.3   | 3.35  | -2.42 | 7.44   | 7.41   | -9.48 | -9.49 | -3.63 | -10.34 | -10.19 | -3.66 | 3.01  | 3.02  | -5.21 | -1.14 |

|     |                                  |       |              |       |              |               |               |               |               |       |               |               |       |              |       |       |       |
|-----|----------------------------------|-------|--------------|-------|--------------|---------------|---------------|---------------|---------------|-------|---------------|---------------|-------|--------------|-------|-------|-------|
| 109 | Stacking energy (109)            | -5.34 | -5.4         | -4.23 | $\bar{3.14}$ | 7.1           | 7.09          | -3.96         | -3.95         | -3.83 | 6.1           | 6.02          | -3.8  | 0.25         | 0.25  | 2.94  | 1.99  |
| 2   | Stacking energy (2)              | 3.45  | 3.47         | -3.1  | $\bar{2.57}$ | 8.34          | 8.29          | 8.82          | 8.83          | -3.7  | -7.36         | -7.27         | -3.72 | $\bar{3.16}$ | -3.18 | 2.15  | 1.14  |
| 33  | Stacking energy (33)             | -5.43 | -5.5         | -4.68 | $\bar{2.93}$ | 5.76          | 5.75          | -2.85         | -2.84         | -2.32 | 4.85          | 4.81          | -2.3  | 1.25         | 1.26  | 3.14  | 1.85  |
| 60  | Stacking energy (60)             | 6.04  | 6.13         | -1.29 | 1.81         | 6.16          | 6.14          | 7.71          | 7.7           | -6.76 | $\bar{10.33}$ | $\bar{10.11}$ | -6.84 | -3.6         | -3.62 | -2.44 | 1.07  |
| 106 | Stacking energy (RNA) (106)      | -2.35 | $\bar{2.36}$ | 4.06  | 2.91         | -5.46         | -5.45         | 2.0           | 2.0           | -2.77 | -0.13         | -0.13         | -2.78 | $\bar{3.36}$ | -3.37 | 1.99  | 1.05  |
| 82  | Thymine content (82)             | -3.52 | 9.02         | 11.73 | 6.72         | -9.54         | 2.21          | -8.78         | 2.45          | -7.07 | 2.16          | -8.77         | 2.42  | $\bar{3.15}$ | -3.17 | -2.16 | -1.15 |
| 117 | Tilt (117)                       | -0.02 | 0.02         | -0.16 | $\bar{0.15}$ | -0.02         | 0.02          | 0.02          | -0.02         | -0.02 | 0.02          | -0.02         | 0.02  | 0.02         | -0.02 | -0.14 | -0.15 |
| 62  | Tilt (62)                        | -0.0  | -0.0         | 0.0   | 0.0          | -0.01         | -0.01         | -0.0          | -0.0          | 0.01  | 0.0           | 0.0           | 0.01  | 0.01         | 0.01  | 0.01  | 0.01  |
| 89  | Tilt (89)                        | -5.0  | $\bar{5.05}$ | -2.83 | $\bar{2.36}$ | 5.73          | 5.72          | $\bar{11.27}$ | $\bar{11.26}$ | 14.78 | -3.52         | -3.53         | 15.03 | 5.33         | 5.38  | -1.95 | -1.05 |
| 93  | Tilt (93)                        | -3.7  | $\bar{3.71}$ | -2.94 | $\bar{2.41}$ | -5.34         | -5.32         | -9.98         | -9.96         | 9.43  | 1.87          | 1.87          | 9.62  | 6.41         | 6.48  | -1.8  | -1.0  |
| 27  | Tilt (DNA-protein complex) (27)  | 4.6   | 4.65         | -2.96 | $\bar{2.42}$ | -8.18         | -7.31         | -9.19         | -9.2          | 4.95  | 5.15          | 5.19          | 4.86  | 1.71         | 1.72  | -2.0  | -1.1  |
| 83  | Tilt (DNA-protein complex) (83)  | 5.72  | 5.79         | -2.85 | $\bar{2.36}$ | -7.98         | -7.94         | -7.11         | -7.1          | 4.85  | 4.36          | 4.4           | 4.76  | $\bar{3.37}$ | -3.39 | -2.1  | -1.15 |
| 103 | Tilt (RNA) (103)                 | -2.19 | -2.2         | 1.31  | $\bar{2.04}$ | 4.03          | 4.04          | 4.69          | 4.71          | 1.96  | 5.72          | 5.67          | 1.96  | $\bar{1.66}$ | -1.66 | -2.22 | -1.17 |
| 70  | Tilt stiffness (70)              | 2.71  | 2.72         | 1.95  | -2.6         | 9.64          | 9.59          | -8.12         | -8.11         | 6.73  | 10.6          | 10.29         | 6.82  | 3.73         | 3.76  | 4.49  | -1.08 |
| 56  | Tilt_rise (56)                   | 7.1   | 7.23         | -3.12 | $\bar{2.38}$ | -5.39         | -5.37         | -8.08         | -8.07         | -5.37 | 2.82          | 2.84          | -5.3  | 1.8          | 1.81  | 1.11  | -1.07 |
| 44  | Tilt_roll (44)                   | 0.07  | 0.08         | 0.03  | $\bar{0.33}$ | 0.04          | 0.05          | 0.03          | 0.03          | -0.05 | -0.09         | -0.09         | -0.05 | $\bar{0.03}$ | -0.04 | -0.04 | 0.03  |
| 54  | Tilt_shift (54)                  | -2.19 | $\bar{2.21}$ | -0.21 | -0.2         | -0.59         | -0.59         | -1.81         | -1.81         | 0.18  | 0.21          | 0.21          | 0.18  | 0.68         | 0.68  | 0.66  | 0.68  |
| 55  | Tilt_slide (55)                  | 7.92  | 8.09         | 6.41  | $\bar{3.09}$ | 3.68          | 3.69          | -1.19         | -1.2          | -4.22 | -0.57         | -0.57         | -4.22 | $\bar{1.99}$ | -2.0  | 1.47  | -0.99 |
| 40  | Tilt_tilt (40)                   | 2.98  | 2.99         | 2.77  | $\bar{2.59}$ | 10.52         | 10.44         | -8.51         | -8.51         | 5.07  | 10.81         | 10.54         | 5.12  | 3.51         | 3.53  | 2.48  | -1.11 |
| 5   | Tip (5)                          | 1.32  | 1.32         | 2.06  | 4.26         | 1.76          | 1.76          | -5.67         | -5.67         | -4.67 | -0.75         | -0.75         | -4.72 | $\bar{4.18}$ | -4.2  | 1.21  | -1.21 |
| 1   | Twist (1)                        | 3.74  | 3.77         | -2.92 | $\bar{2.45}$ | -9.82         | -9.76         | 8.63          | 8.63          | -7.18 | 8.23          | 8.19          | -7.21 | $\bar{3.67}$ | -3.68 | 1.98  | -1.18 |
| 118 | Twist (118)                      | 5.41  | 5.47         | 7.09  | $\bar{0.01}$ | -4.42         | -4.42         | -1.88         | -1.88         | -0.12 | 0.89          | 0.89          | -0.12 | $\bar{4.83}$ | -4.85 | -3.77 | -1.62 |
| 120 | Twist (120)                      | 5.31  | 5.37         | 3.72  | $\bar{2.01}$ | -2.23         | -2.23         | -9.17         | -9.21         | -3.09 | 5.8           | 5.8           | -3.1  | $\bar{5.89}$ | -5.88 | 1.63  | -1.27 |
| 61  | Twist (61)                       | -2.98 | $\bar{2.99}$ | -3.02 | 2.59         | $\bar{10.03}$ | -9.96         | 8.7           | 8.7           | -7.14 | 8.22          | 8.17          | -7.16 | $\bar{3.82}$ | -3.83 | 2.07  | -1.16 |
| 88  | Twist (88)                       | 1.98  | 1.98         | -2.54 | 2.81         | 1.41          | 1.41          | 5.2           | 5.19          | -7.29 | 6.67          | 6.67          | -7.33 | $\bar{4.03}$ | -4.05 | 1.82  | -1.21 |
| 92  | Twist (92)                       | -2.71 | $\bar{2.72}$ | -3.06 | 2.57         | -9.89         | -9.83         | 8.59          | 8.6           | -7.02 | 8.64          | 8.58          | -7.03 | $\bar{3.26}$ | -3.28 | 2.05  | 1.09  |
| 98  | Twist (98)                       | 3.98  | 4.01         | -2.86 | 2.79         | 4.61          | 4.6           | 5.2           | 5.19          | -7.19 | 7.84          | 7.79          | -7.2  | $\bar{4.65}$ | -4.67 | 2.12  | -1.16 |
| 26  | Twist (DNA-protein complex) (26) | 4.47  | 4.51         | -2.92 | 2.69         | $\bar{10.72}$ | $\bar{10.64}$ | 6.92          | 7.01          | -7.56 | 6.37          | 6.37          | -7.61 | $\bar{4.29}$ | -4.31 | 1.42  | 0.98  |
| 37  | Twist (DNA-protein complex) (37) | 3.88  | 3.91         | -3.04 | 2.6          | -10.0         | -9.93         | 8.47          | 8.48          | -7.12 | 8.05          | 8.0           | -7.15 | $\bar{3.39}$ | -3.4  | -2.54 | 1.11  |
| 105 | Twist (RNA) (105)                | -2.84 | $\bar{2.86}$ | 3.31  | 2.92         | 6.68          | 6.66          | -8.15         | -8.17         | -7.36 | 6.21          | 6.19          | -7.38 | 2.78         | 2.79  | 2.11  | -1.15 |
| 71  | Twist stiffness (71)             | 3.85  | 3.81         | 3.31  | $\bar{2.48}$ | 8.26          | 8.21          | -9.06         | -9.08         | 6.68  | -3.82         | -3.8          | 6.63  | 1.03         | 1.04  | -4.24 | -1.15 |
| 53  | Twist_rise (53)                  | 3.2   | 3.22         | -3.17 | -2.6         | 10.84         | 10.76         | -6.08         | -6.08         | 8.39  | -4.99         | -4.99         | 8.45  | $\bar{2.97}$ | -2.98 | 2.25  | -1.09 |
| 43  | Twist_roll (43)                  | 8.83  | 9.01         | 9.9   | 4.74         | 2.01          | 2.01          | -7.13         | -7.17         | -4.52 | 3.39          | 3.41          | -4.56 | $\bar{4.06}$ | -4.08 | 0.54  | -1.23 |
| 51  | Twist_shift (51)                 | 6.64  | 6.73         | -4.06 | $\bar{2.98}$ | -2.73         | -2.73         | -3.66         | -3.66         | -3.15 | -4.79         | -4.83         | -3.12 | 1.76         | 1.78  | -1.68 | 0.9   |
| 52  | Twist_slide (52)                 | 3.3   | 3.32         | -3.24 | $\bar{2.58}$ | 9.81          | 9.75          | -8.56         | -8.56         | 6.54  | 10.29         | 10.1          | 6.61  | 3.48         | 3.5   | 2.49  | -1.11 |
| 42  | Twist_tilt (42)                  | 5.29  | 5.22         | -3.71 | $\bar{3.46}$ | 0.29          | 0.29          | -2.89         | -2.89         | -2.04 | -0.37         | -0.38         | -2.01 | -1.6         | -1.62 | -3.4  | 0.56  |
| 39  | Twist_twist (39)                 | 4.53  | 4.57         | 4.0   | $\bar{2.21}$ | 7.07          | 7.04          | -9.04         | -9.05         | 5.01  | 3.13          | 3.14          | 4.97  | 2.75         | 2.77  | 1.38  | -1.15 |
| 99  | Wedge (99)                       | 3.67  | 3.7          | -2.9  | $\bar{2.45}$ | -9.19         | -9.14         | -8.49         | -8.52         | 7.05  | 7.35          | 7.35          | 7.04  | $\bar{3.21}$ | -3.23 | 1.81  | 1.12  |

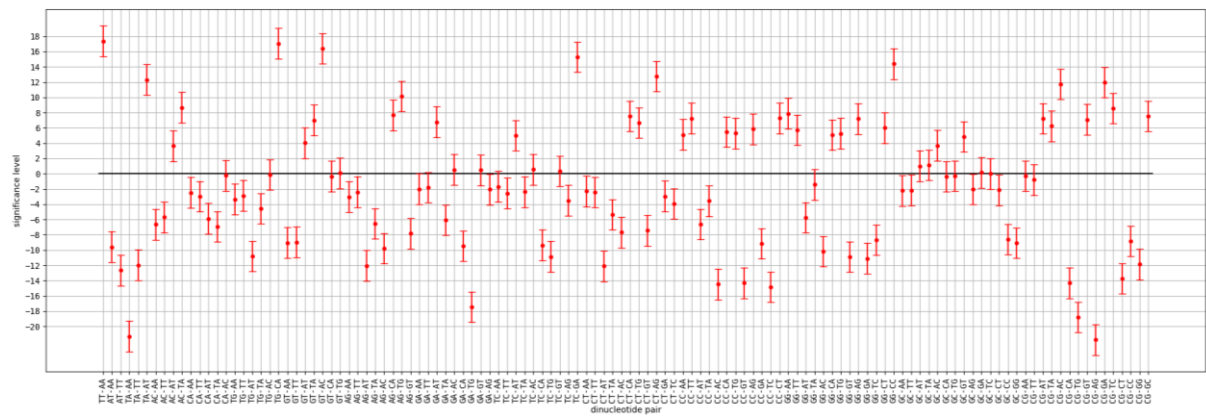

**Figure S1: Significance levels of dimer-pairs:** Significance levels for correlations (see 2.1) of all dinucleotide pairs (x-axis) in relation to Chargaff model. Deviations from zero larger than 1.0 were not expected by the model and are thus considered significant.
